# Supplementary material for: Anti-cancer effects of bis-oxidized thiopyran derivatives on non-small cell lung cancer: rational design, synthesis, and activity evaluation
Source: Royal Society of Chemistry journal article supplement (doi:10.1039/d3nj04021f), 2024-01-01
Supplement: d3nj04021f1.pdf [file d3nj04021f1.pdf]

## Supplementary Materials for review

### Anti-cancer effects of Bis-oxidized thiopyran derivatives in non-small cell lung cancer: Rational design, synthesis, and activity evaluation

Han Zhang<sup>a,1</sup>, Cilong Chu<sup>a,1</sup>, Li Long<sup>a</sup>, Pengwu Zheng<sup>a,\*</sup>, Wufu Zhu<sup>a,\*+</sup>

<sup>a</sup> Jiangxi Provincial Key Laboratory of Drug Design and Evaluation, School of Pharmacy, Jiangxi Science & Technology Normal University, 605 Fenglin Road, Nanchang, Jiangxi, 330013, China

#### Table of Contents

|                                    |       |
|------------------------------------|-------|
| <sup>1</sup> H NMR spectrums-----  | 1-9   |
| <sup>13</sup> C NMR spectrums----- | 10-15 |
| HPLC spectrums-----                | 16-18 |
| TOF MS spectrums-----              | 18-26 |

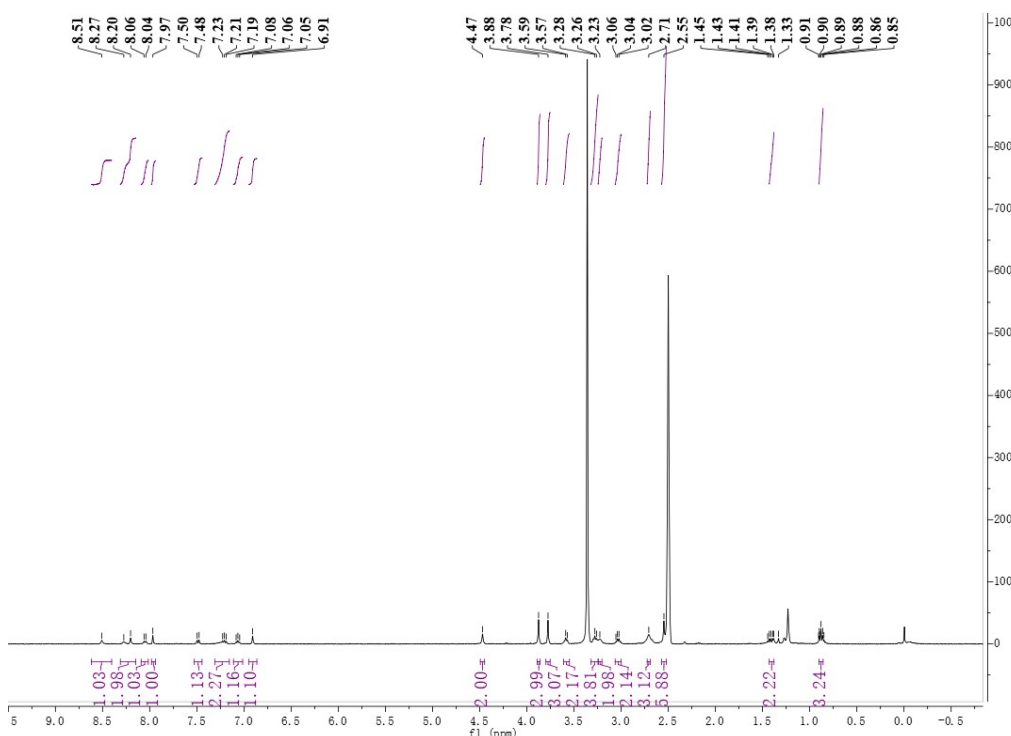

Figure.1. <sup>1</sup>H NMR spectrum of compound S-1

\* Corresponding authors.

E-mail addresses: zhengpw@126.com (P. Zheng), zhuwufu-1122@163.com (W. Zhu).

<sup>1</sup> These authors contributed equally to this work.

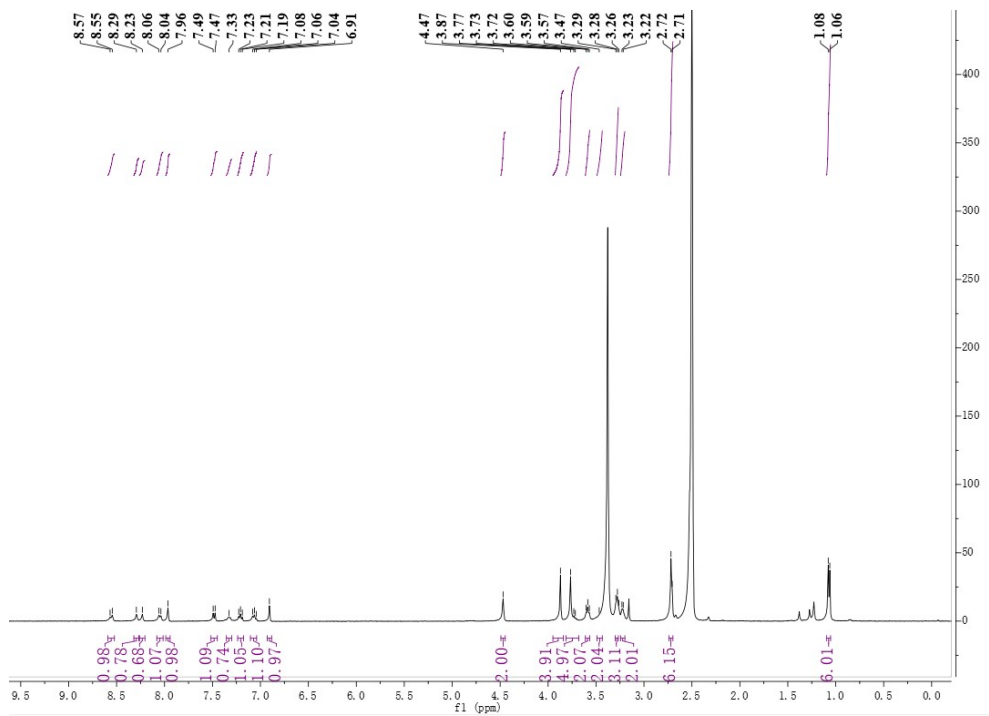

Figure.2. <sup>1</sup>H NMR spectrum of compound S-2

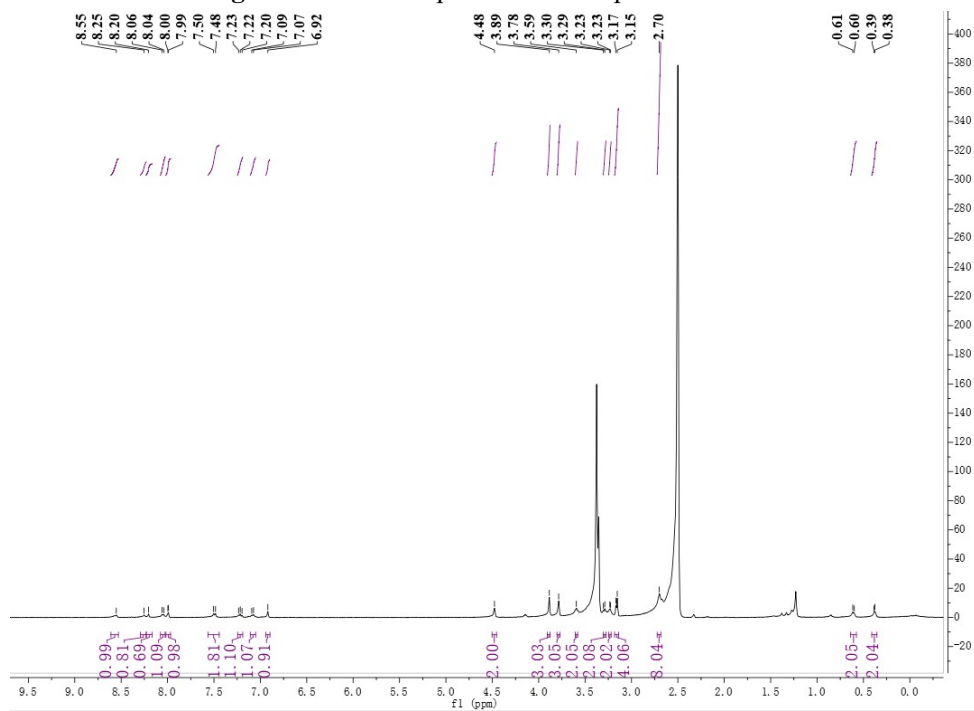

Figure.3. <sup>1</sup>H NMR spectrum of compound S-3

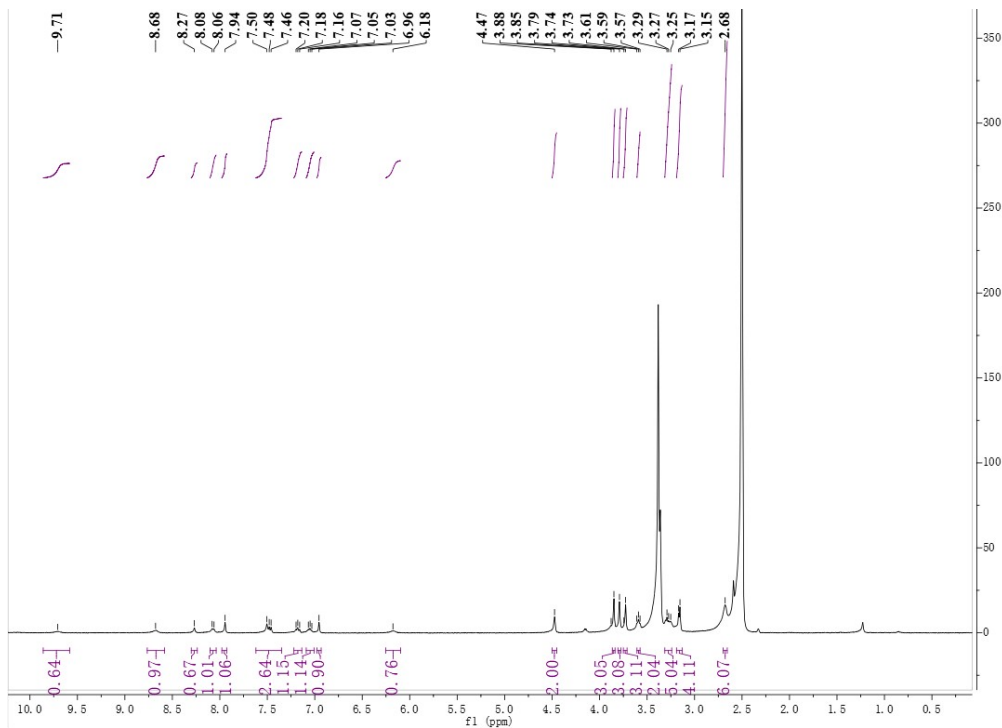

Figure.4. <sup>1</sup>H NMR spectrum of compound S-4

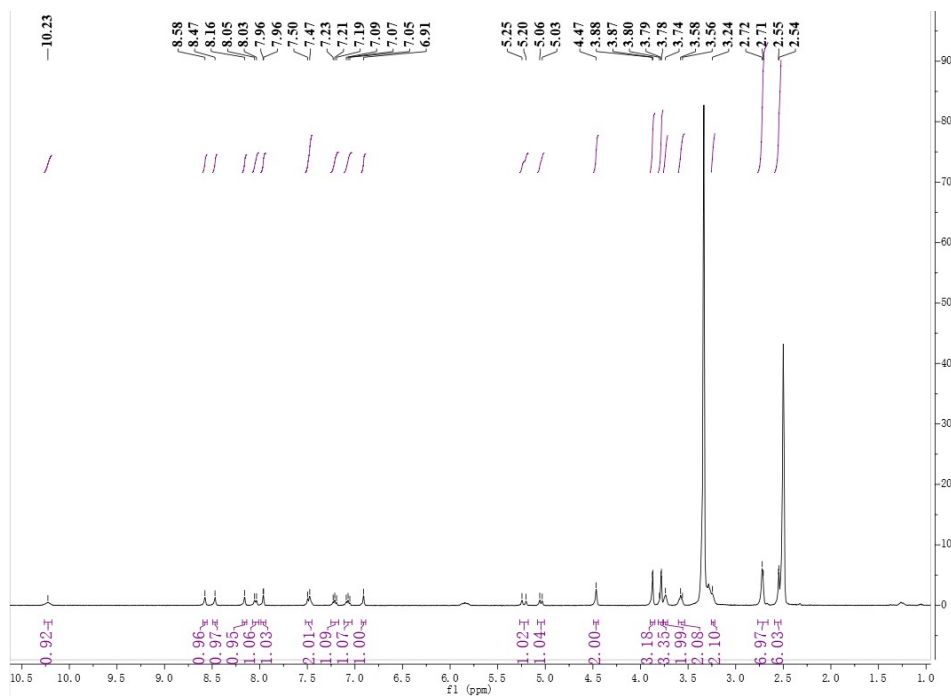

Figure.5. <sup>1</sup>H NMR spectrum of compound S-5

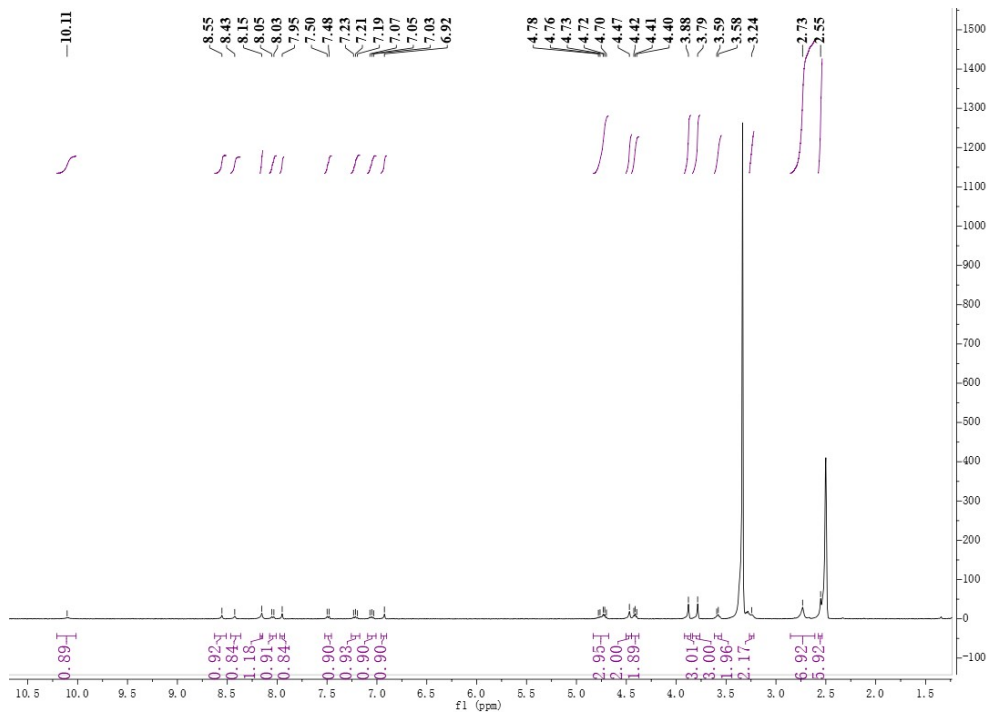

Figure.6.  $^1\text{H}$  NMR spectrum of compound S-6

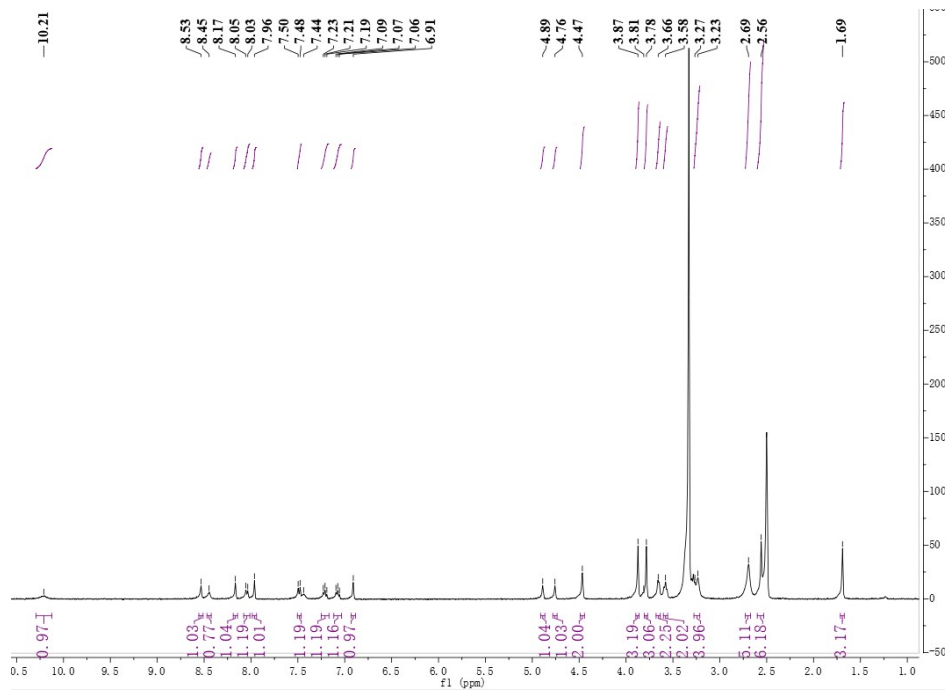

Figure.7.  $^1\text{H}$  NMR spectrum of compound S-7

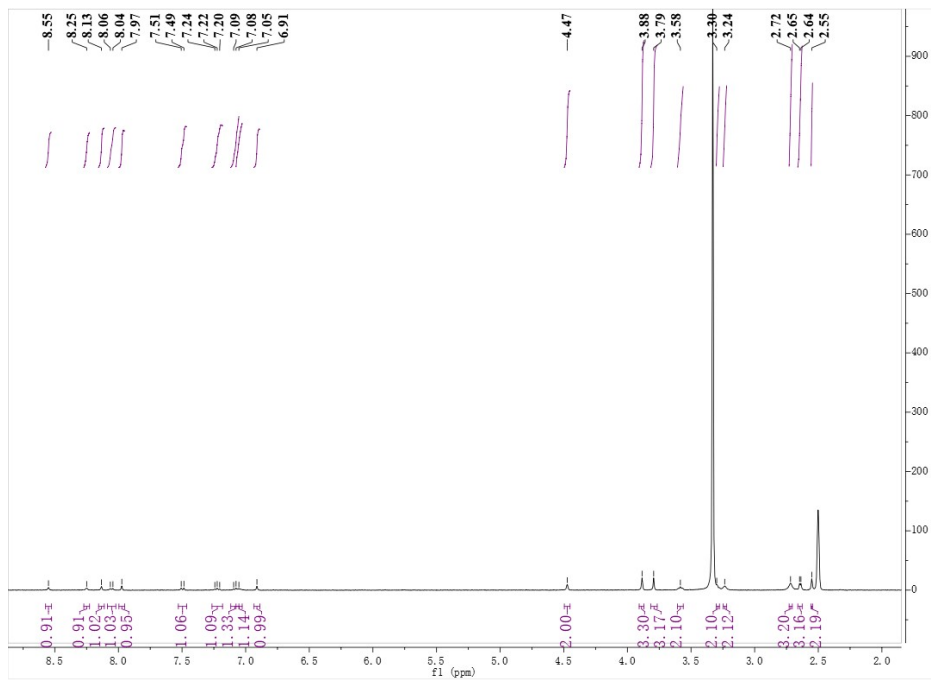

Figure.8.  $^1\text{H}$  NMR spectrum of compound S-8

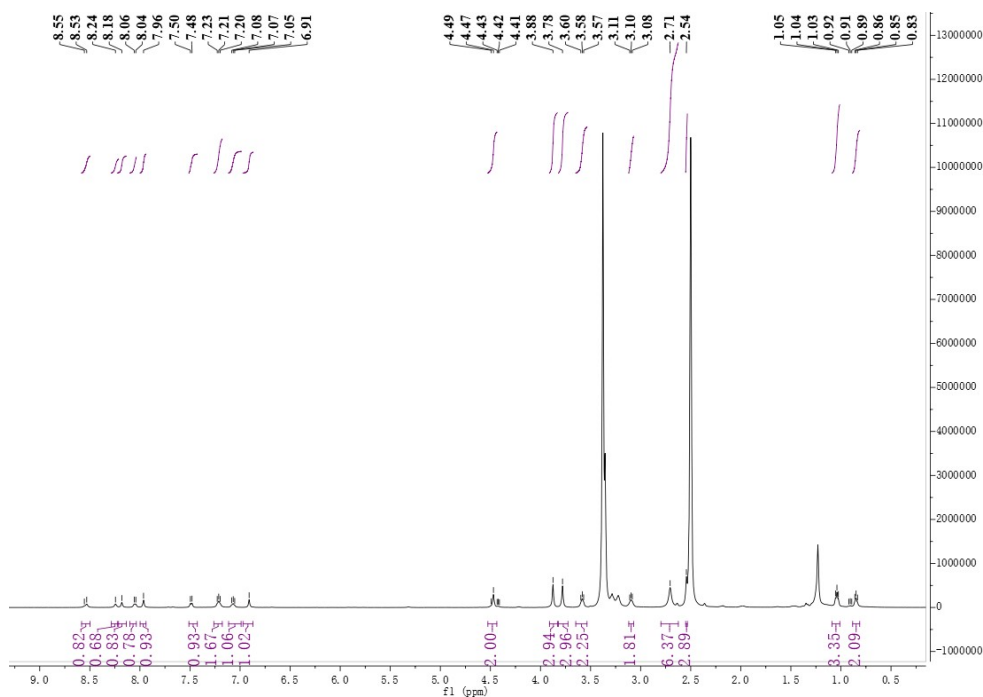

Figure.9.  $^1\text{H}$  NMR spectrum of compound S-9

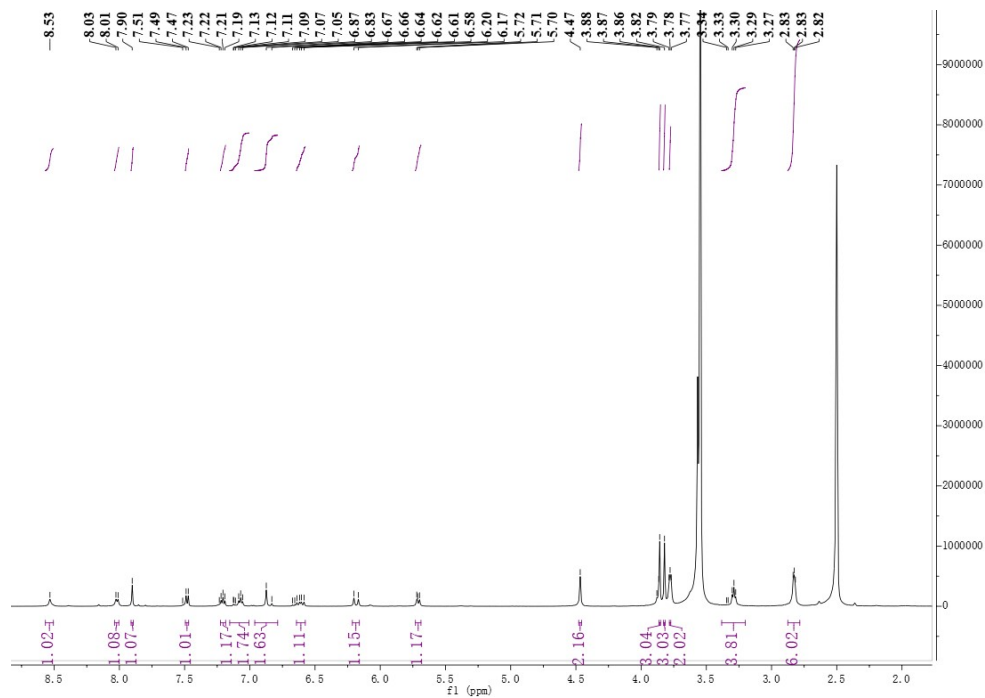

Figure.10.  $^1\text{H}$  NMR spectrum of compound S-10

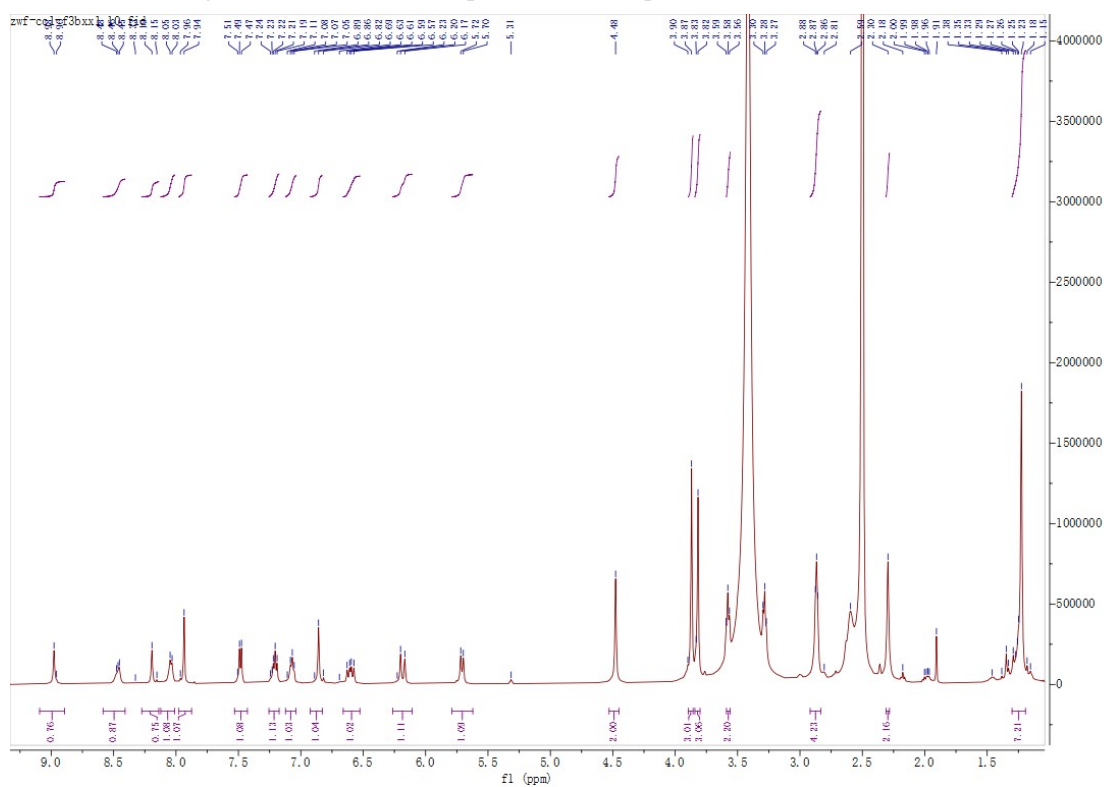

Figure.11.  $^1\text{H}$  NMR spectrum of compound S-11

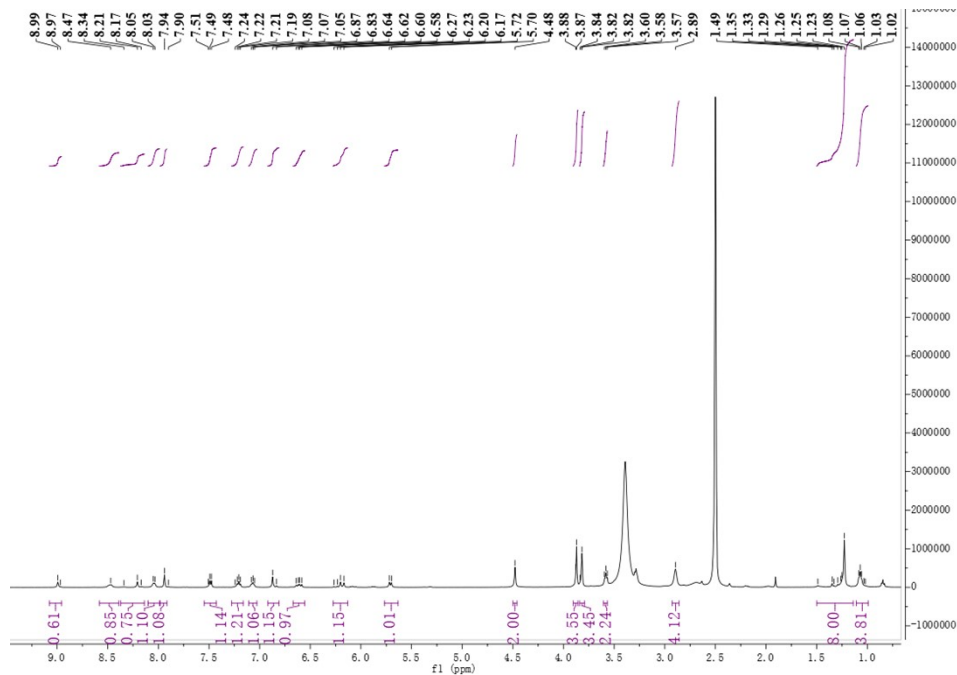

Figure.12.  $^1\text{H}$  NMR spectrum of compound S-12

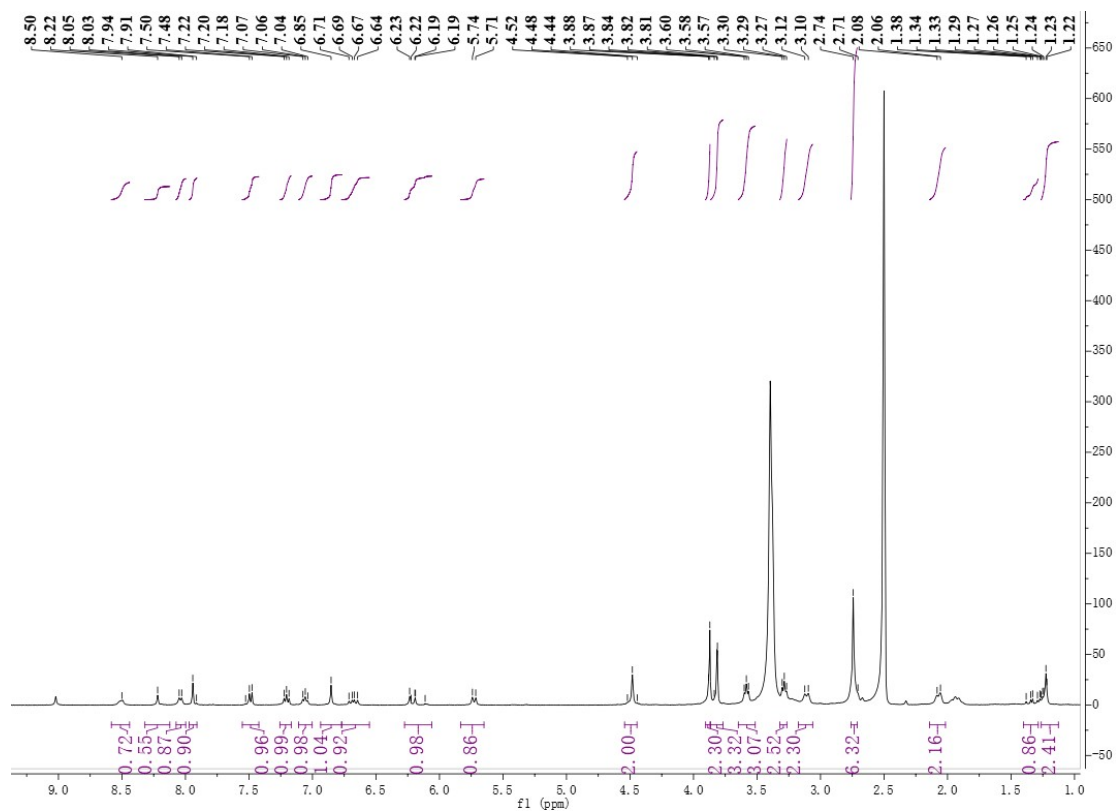

Figure.13.  $^1\text{H}$  NMR spectrum of compound S-13

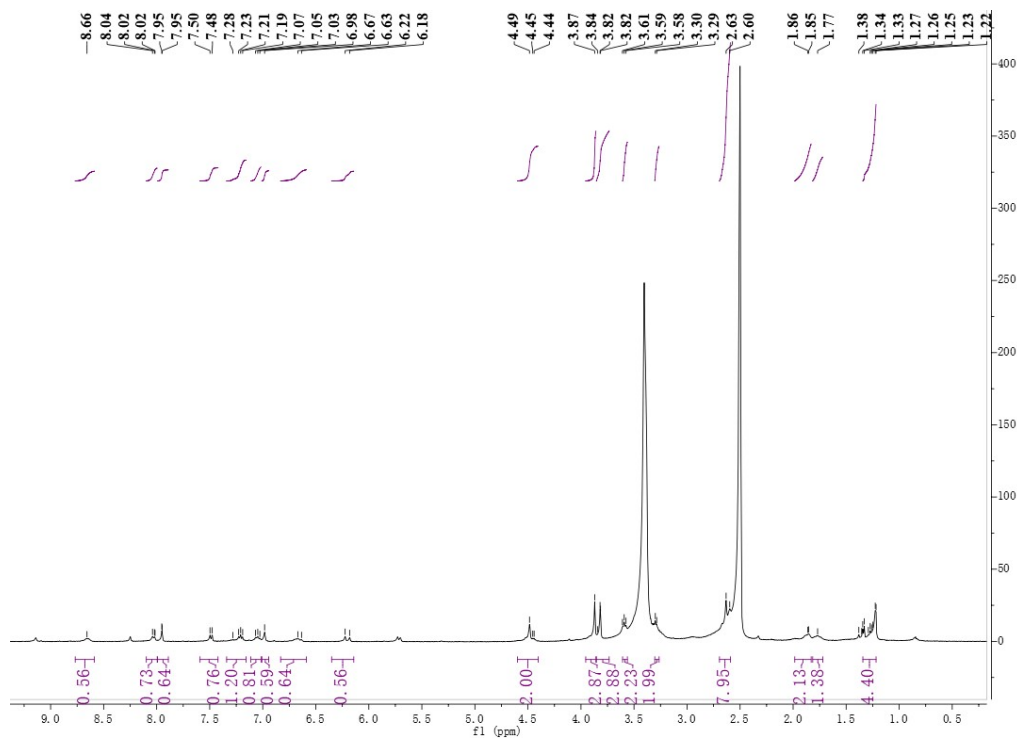

Figure.14.  $^1\text{H}$  NMR spectrum of compound S-14

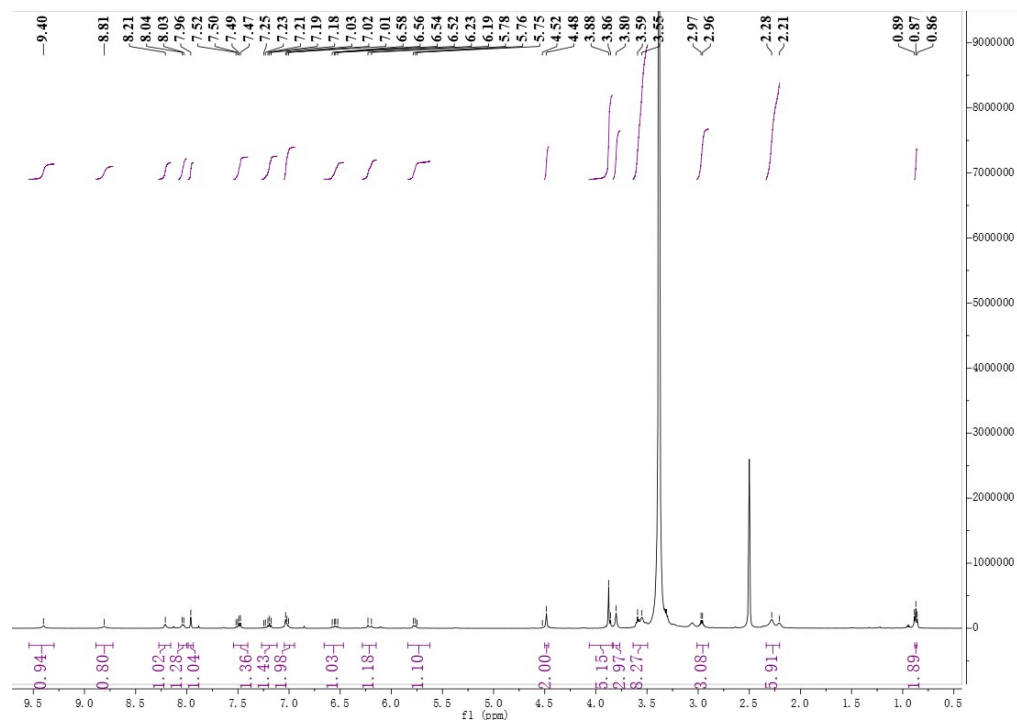

Figure.15.  $^1\text{H}$  NMR spectrum of compound S-15



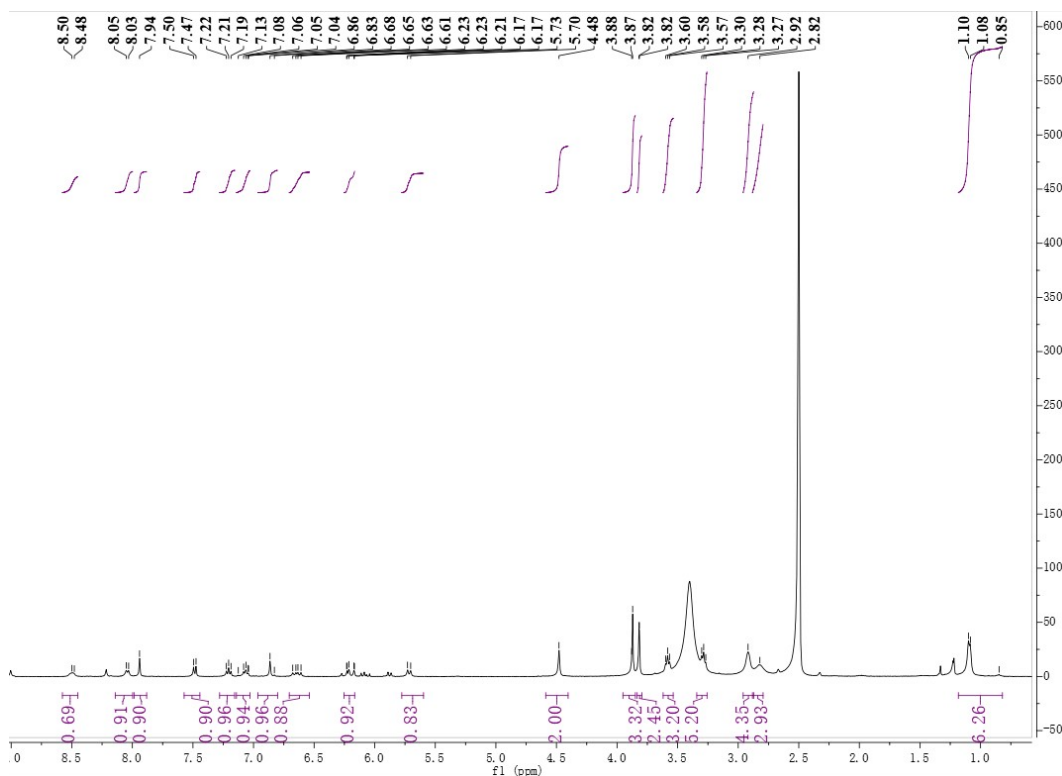

Figure.16.  $^1\text{H}$  NMR spectrum of compound S-16

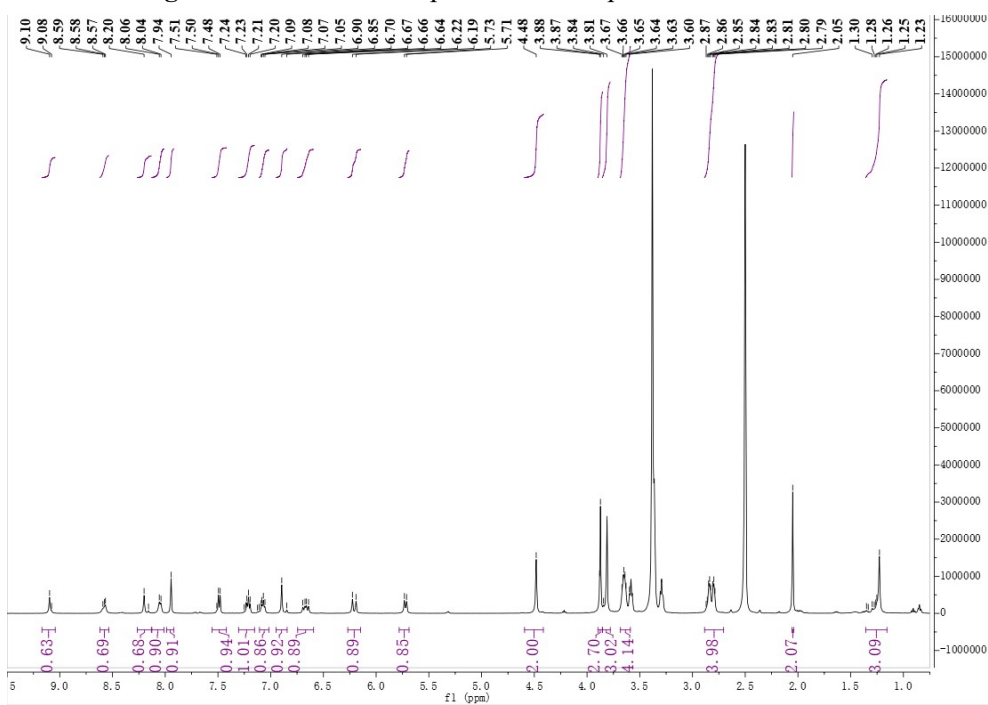

Figure.17.  $^1\text{H}$  NMR spectrum of compound S-17

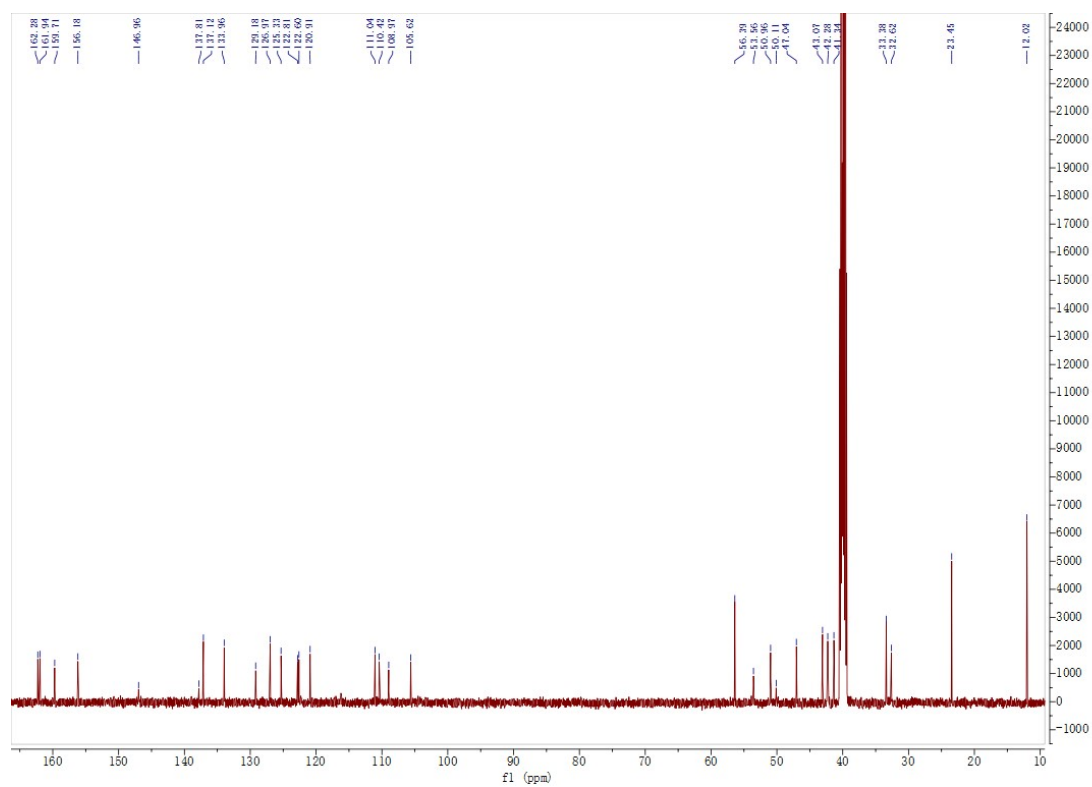

Figure.18.  $^{13}\text{C}$  NMR spectrum of compound S-1

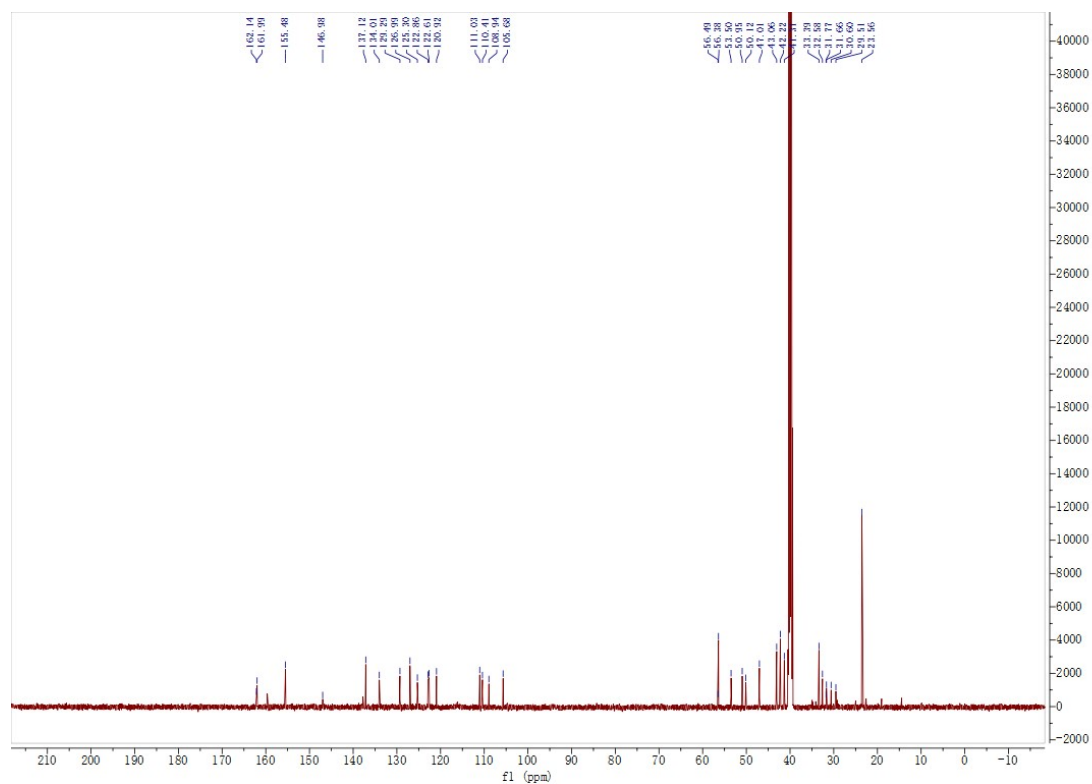

Figure.19.  $^{13}\text{C}$  NMR spectrum of compound S-2

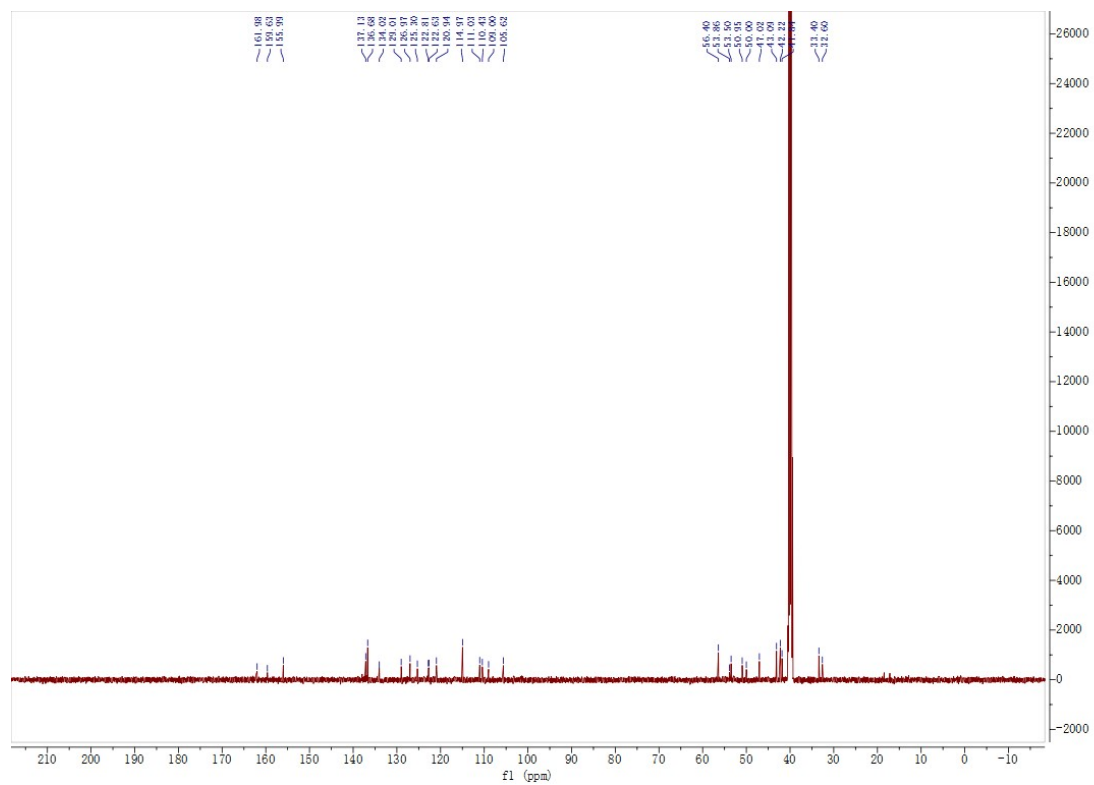

Figure.20.  $^{13}\text{C}$  NMR spectrum of compound S-5

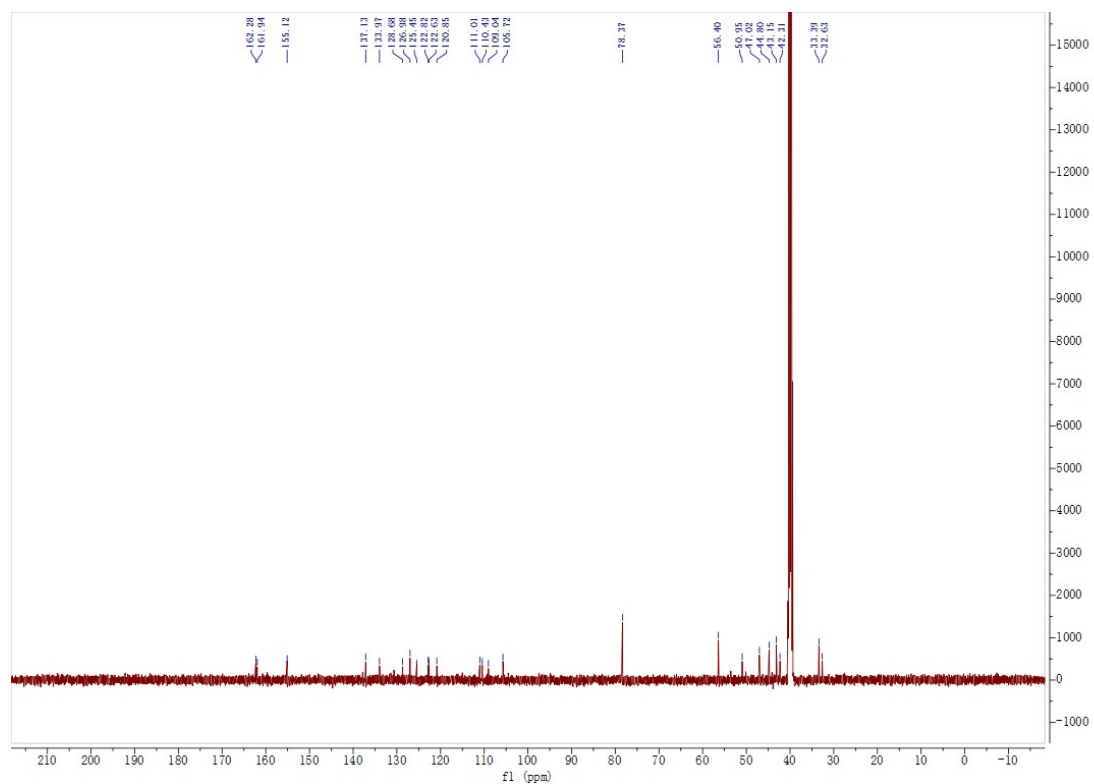

Figure.21.  $^{13}\text{C}$  NMR spectrum of compound S-6

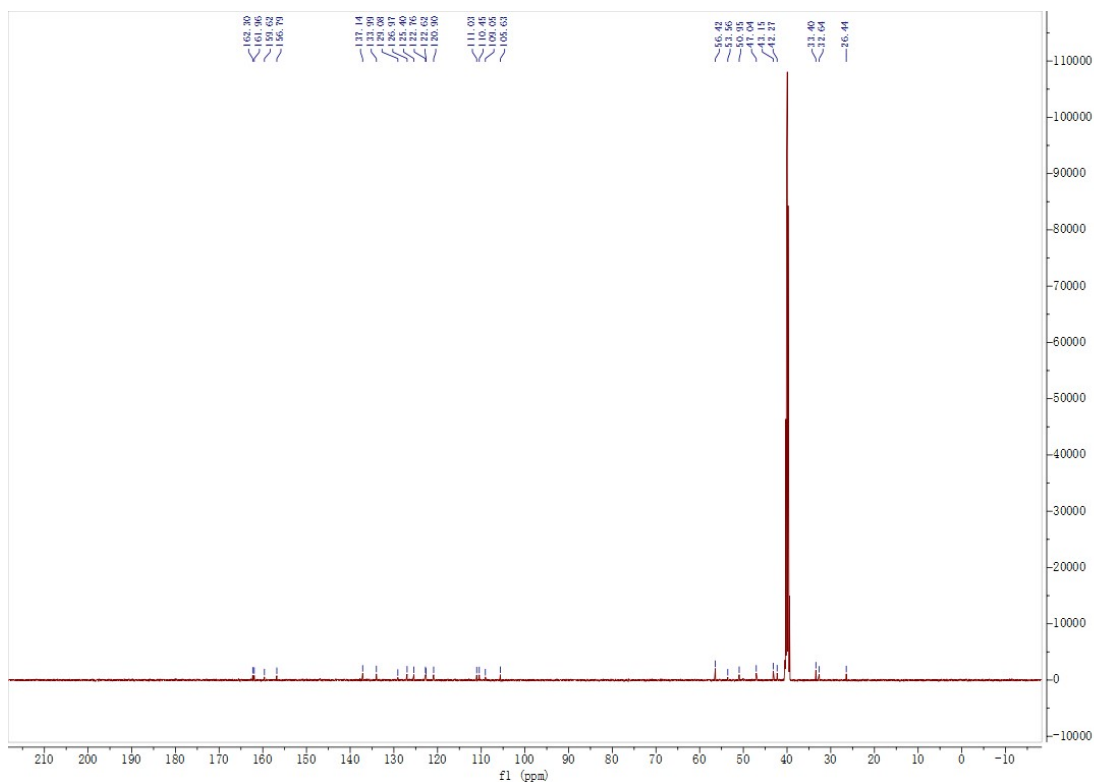

**Figure.22.**  $^{13}\text{C}$  NMR spectrum of compound S-8

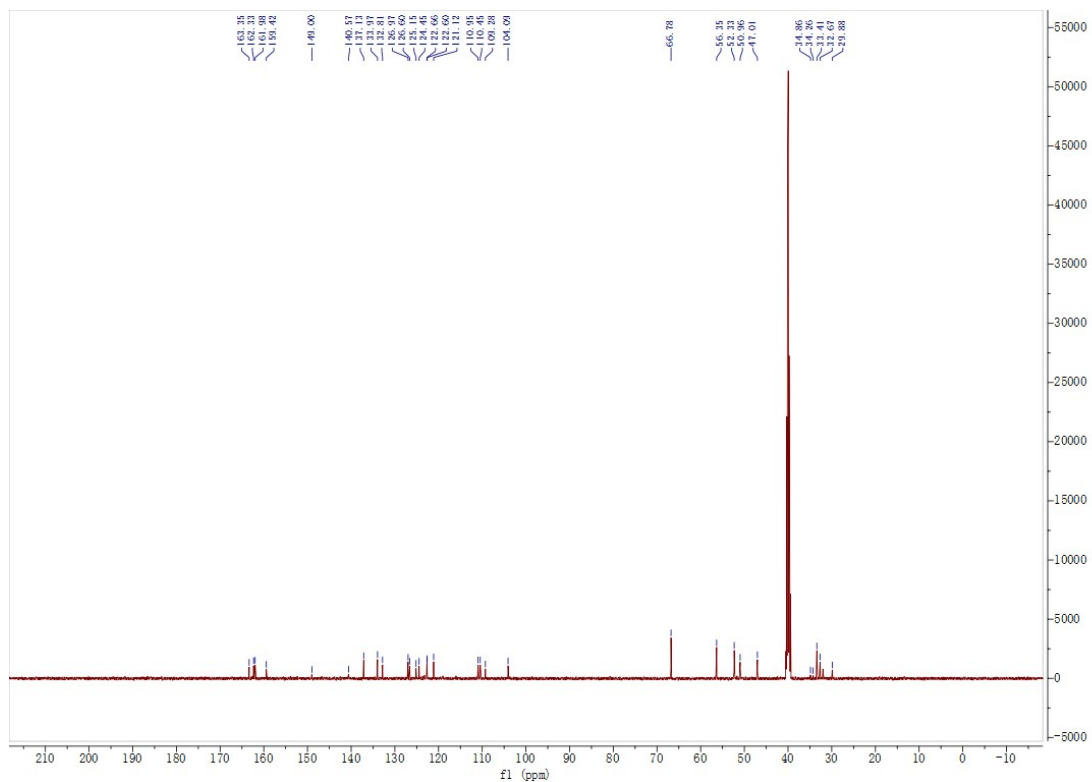

**Figure.23.**  $^{13}\text{C}$  NMR spectrum of compound S-10

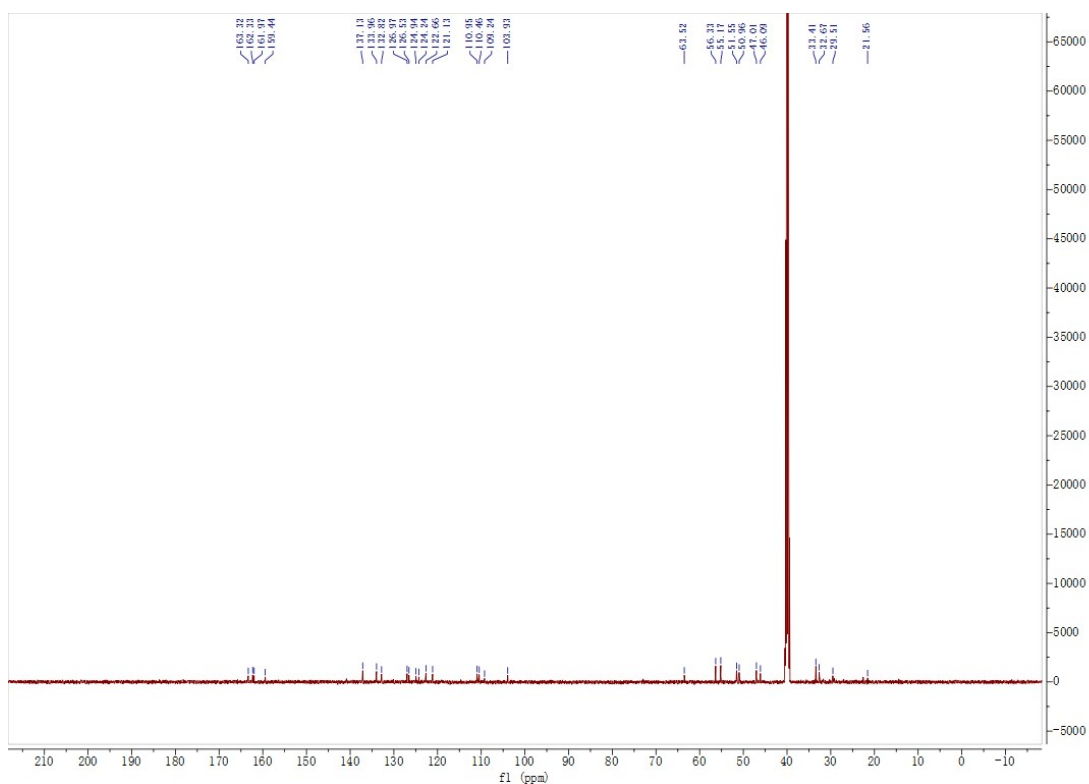

Figure.24.  $^{13}\text{C}$  NMR spectrum of compound S-11

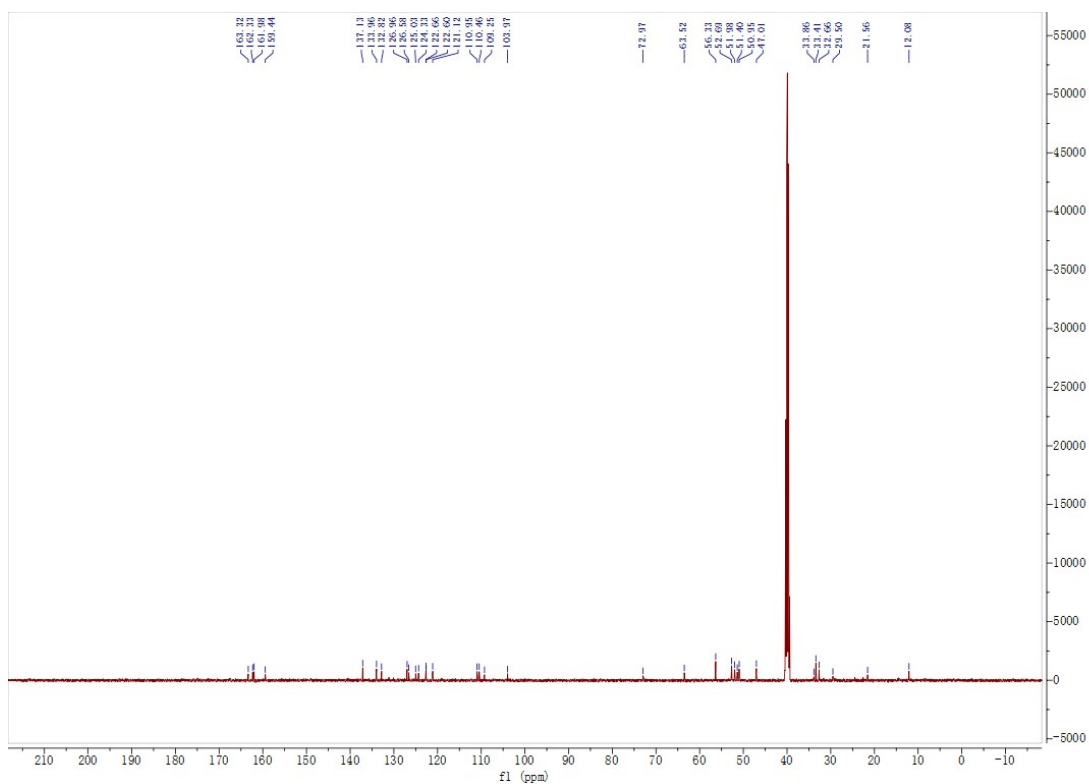

Figure.25.  $^{13}\text{C}$  NMR spectrum of compound S-12

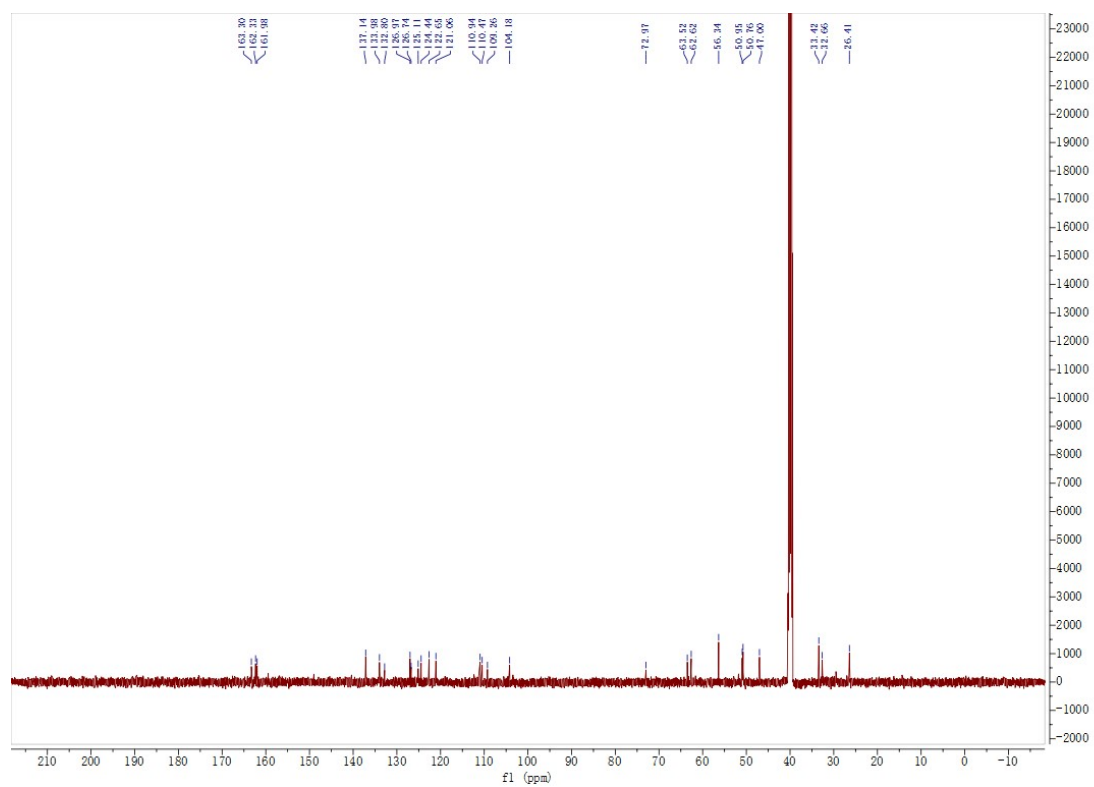

Figure.26.  $^{13}\text{C}$  NMR spectrum of compound S-13

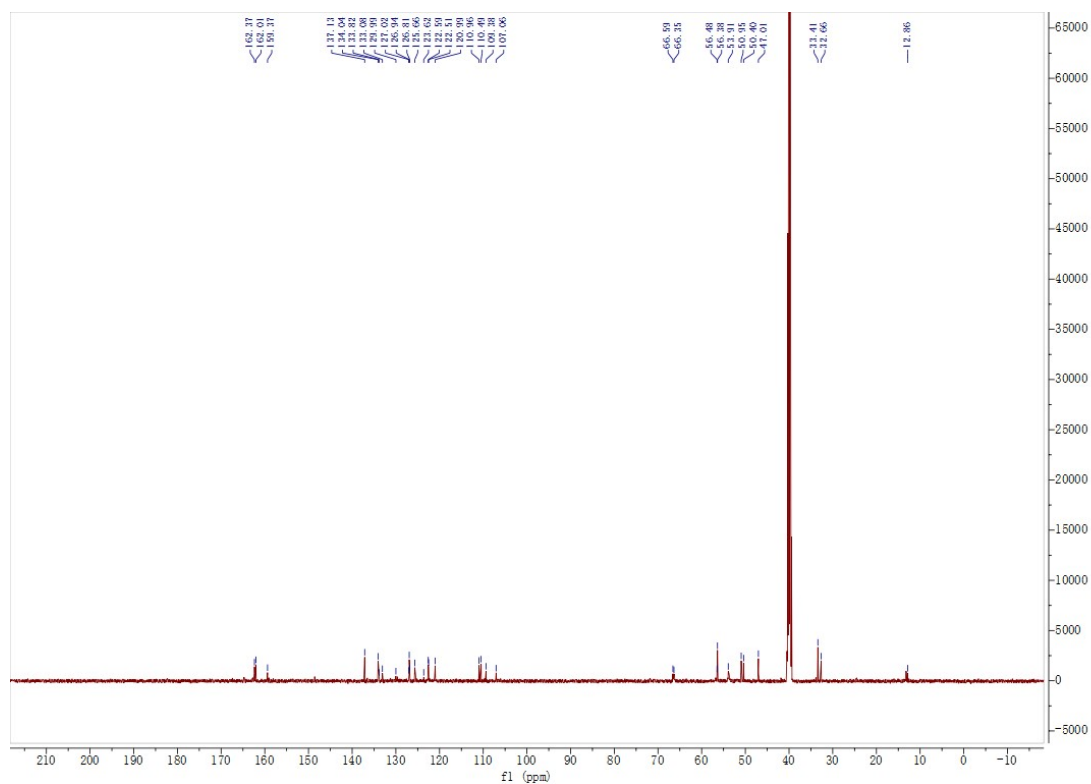

Figure.27.  $^{13}\text{C}$  NMR spectrum of compound S-15

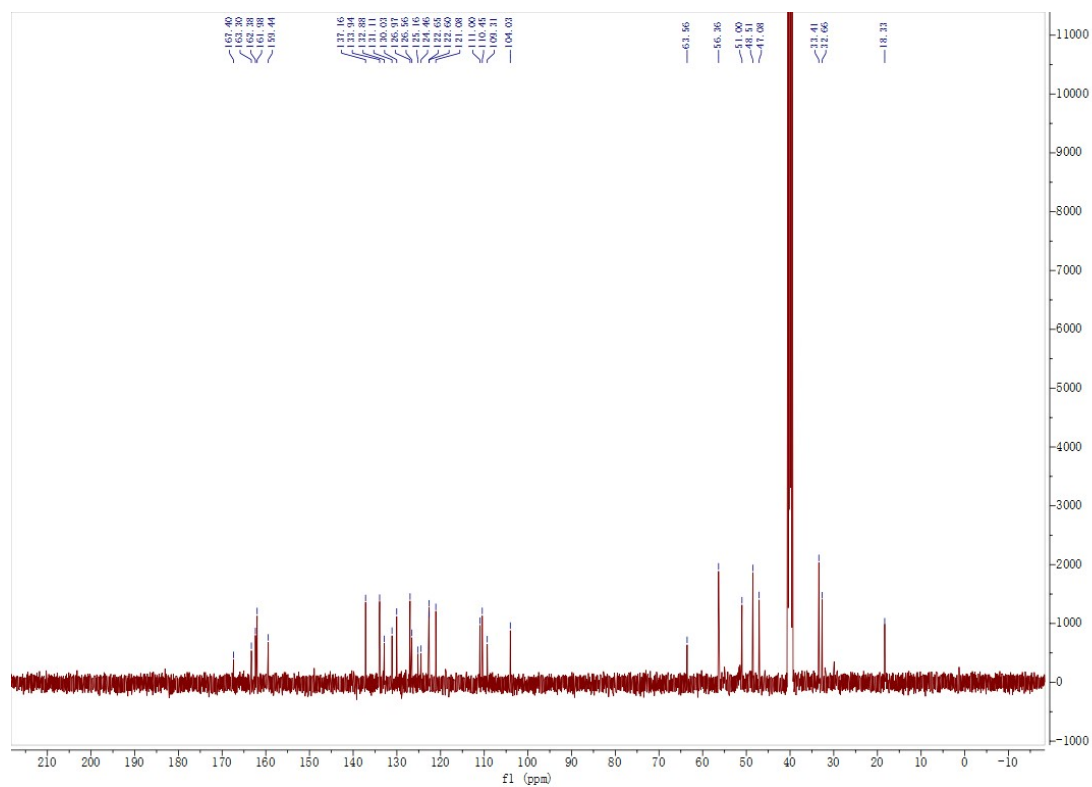

**Figure.28.**  $^{13}\text{C}$  NMR spectrum of compound S-16

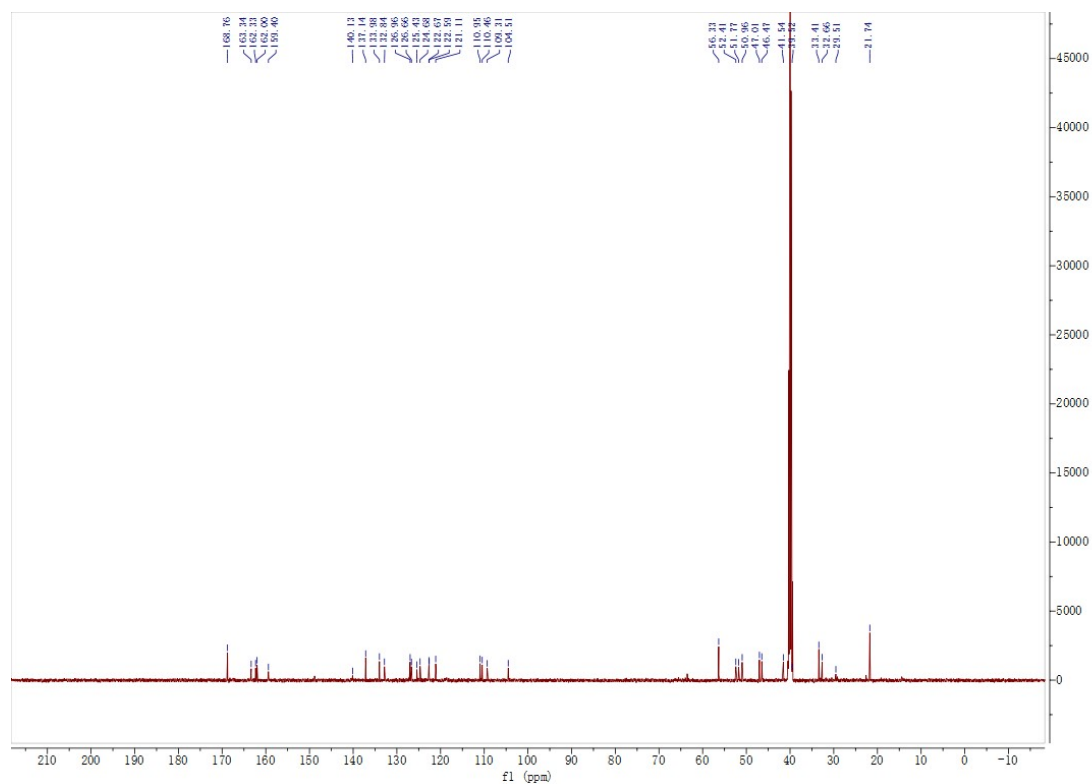

**Figure.29.**  $^{13}\text{C}$  NMR spectrum of compound S-17

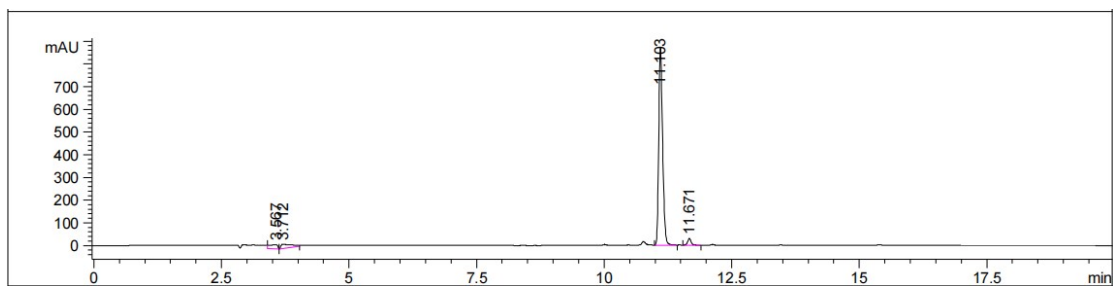

**Figure.30.** HPLC spectrum of compound S-1

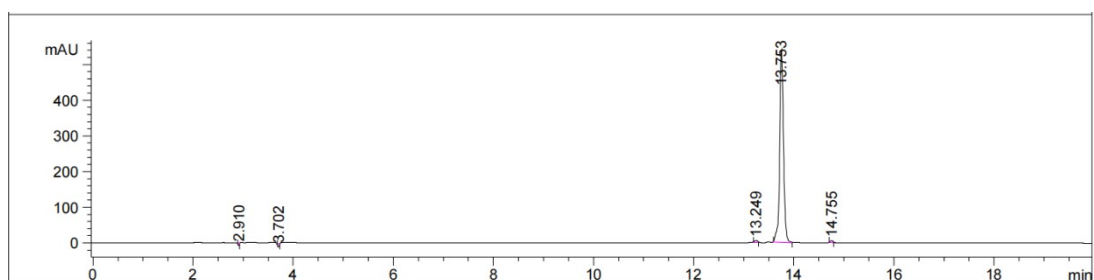

**Figure.31.** HPLC spectrum of compound S-2

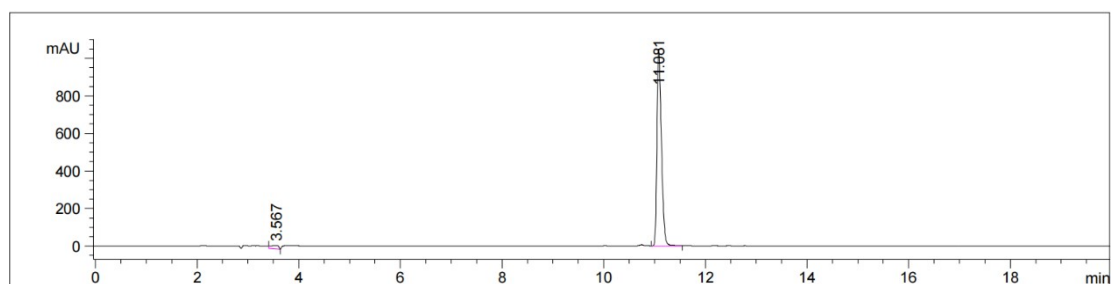

**Figure.32.** HPLC spectrum of compound S-3

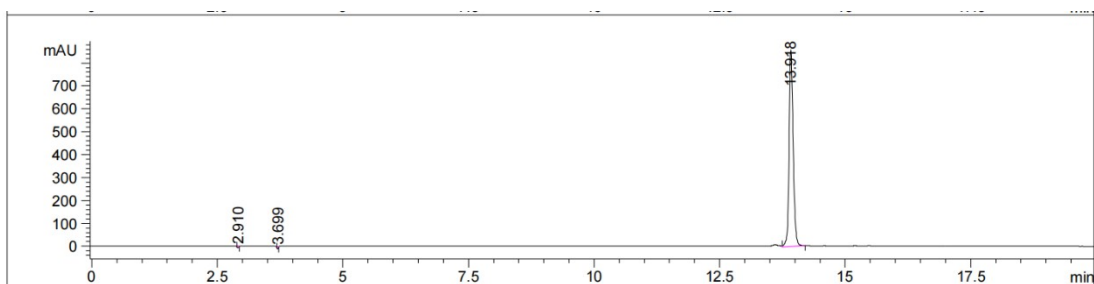

**Figure.33.** HPLC spectrum of compound S-4

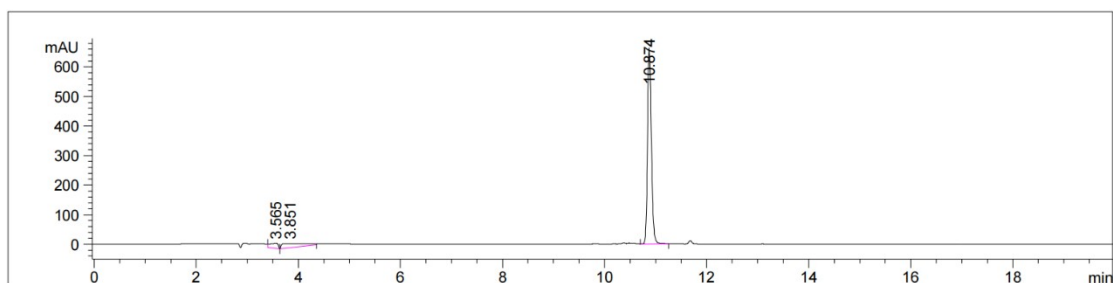

**Figure.34.** HPLC spectrum of compound S-5



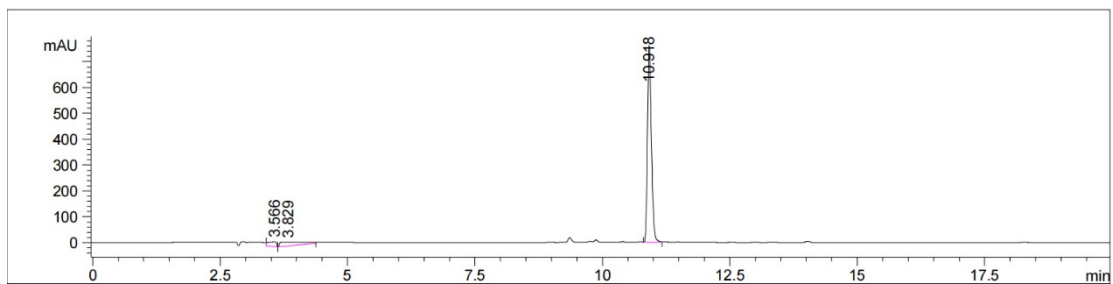

**Figure.35.** HPLC spectrum of compound S-6

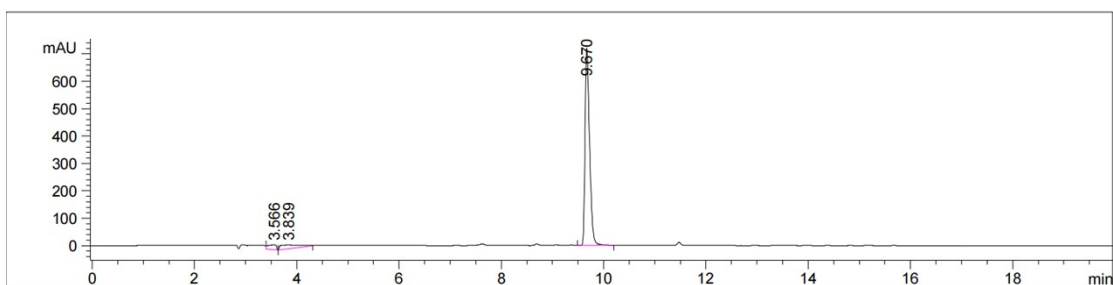

**Figure.36.** HPLC spectrum of compound S-7

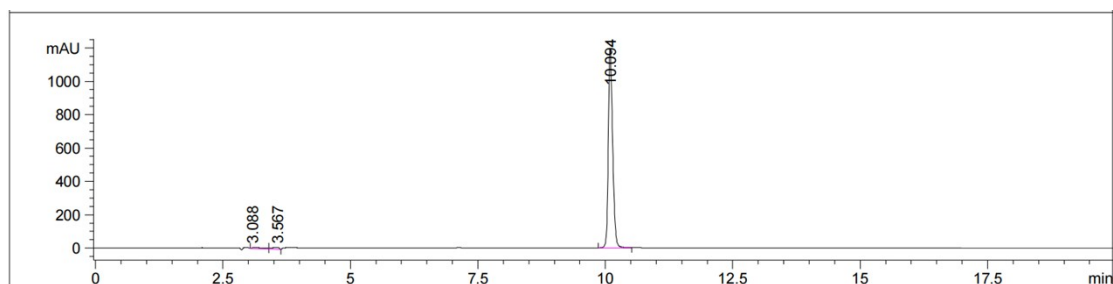

**Figure.37.** HPLC spectrum of compound S-8

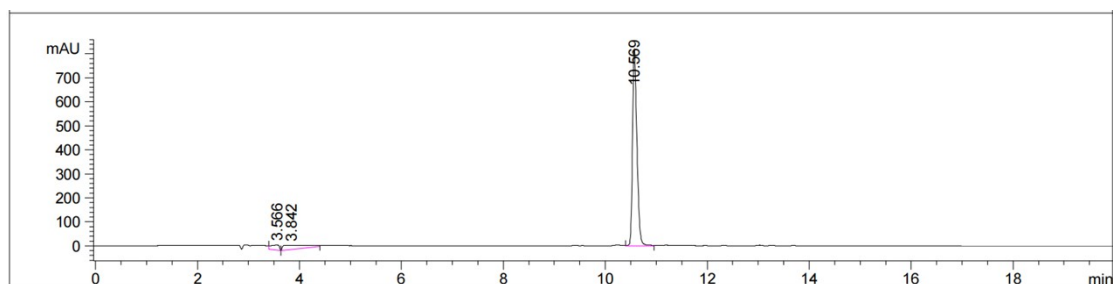

**Figure.38.** HPLC spectrum of compound S-9

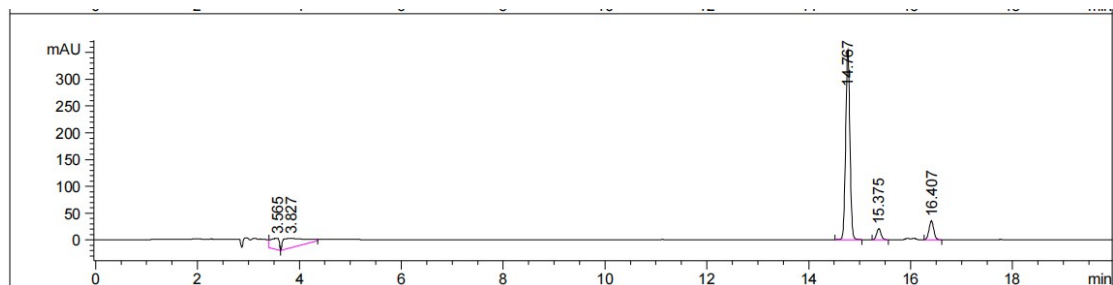

**Figure.39.** HPLC spectrum of compound S-10

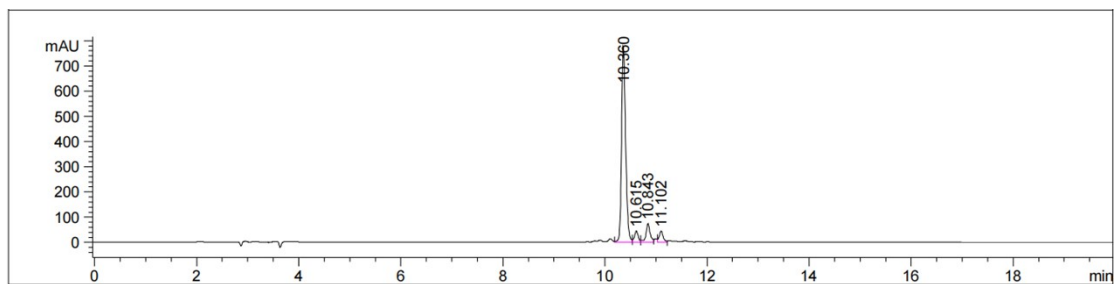

**Figure.40.** HPLC spectrum of compound S-11

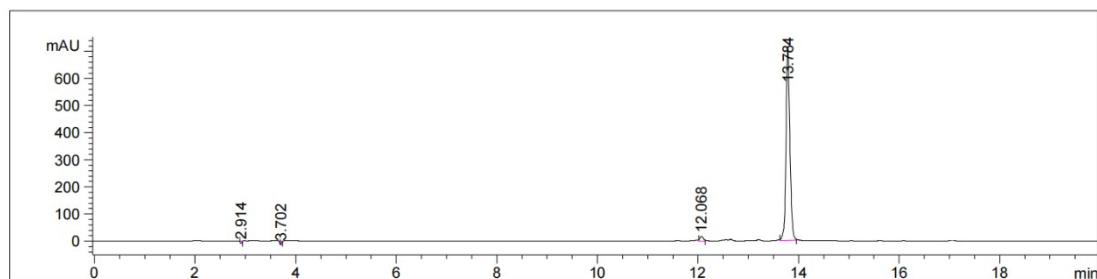

**Figure.41.** HPLC spectrum of compound S-12

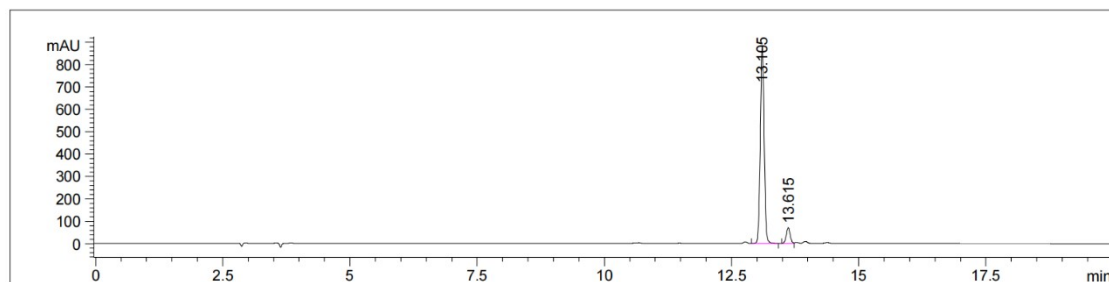

**Figure.42.** HPLC spectrum of compound S-13

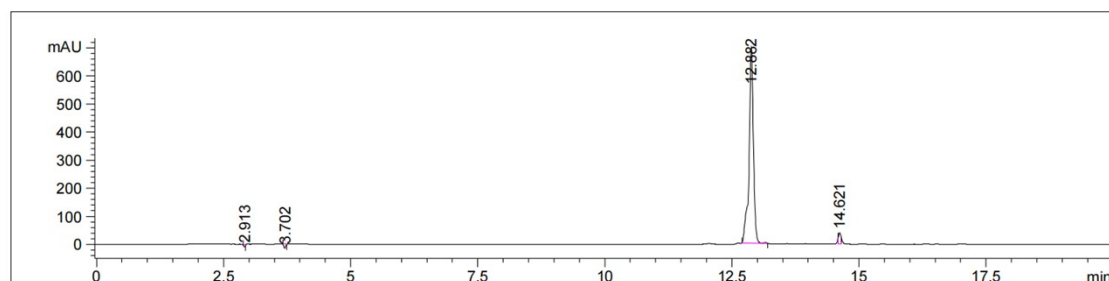

**Figure.43.** HPLC spectrum of compound S-14

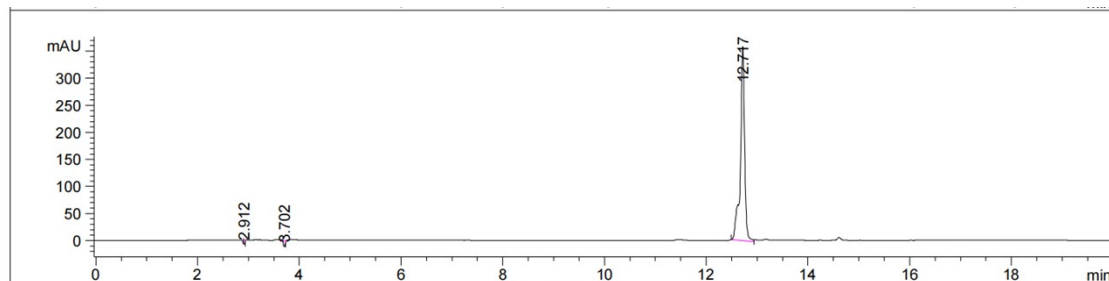

**Figure.44.** HPLC spectrum of compound S-15

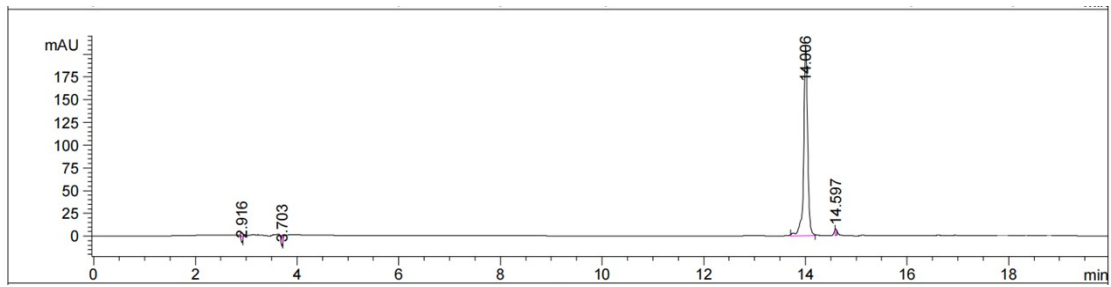

Figure.45. HPLC spectrum of compound S-16

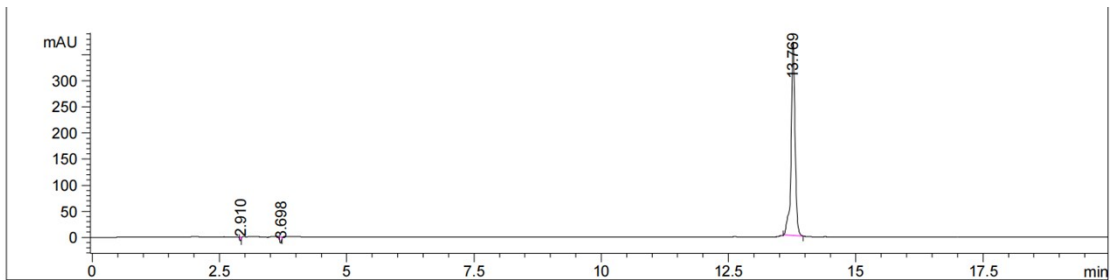

Figure.46. HPLC spectrum of compound S-17

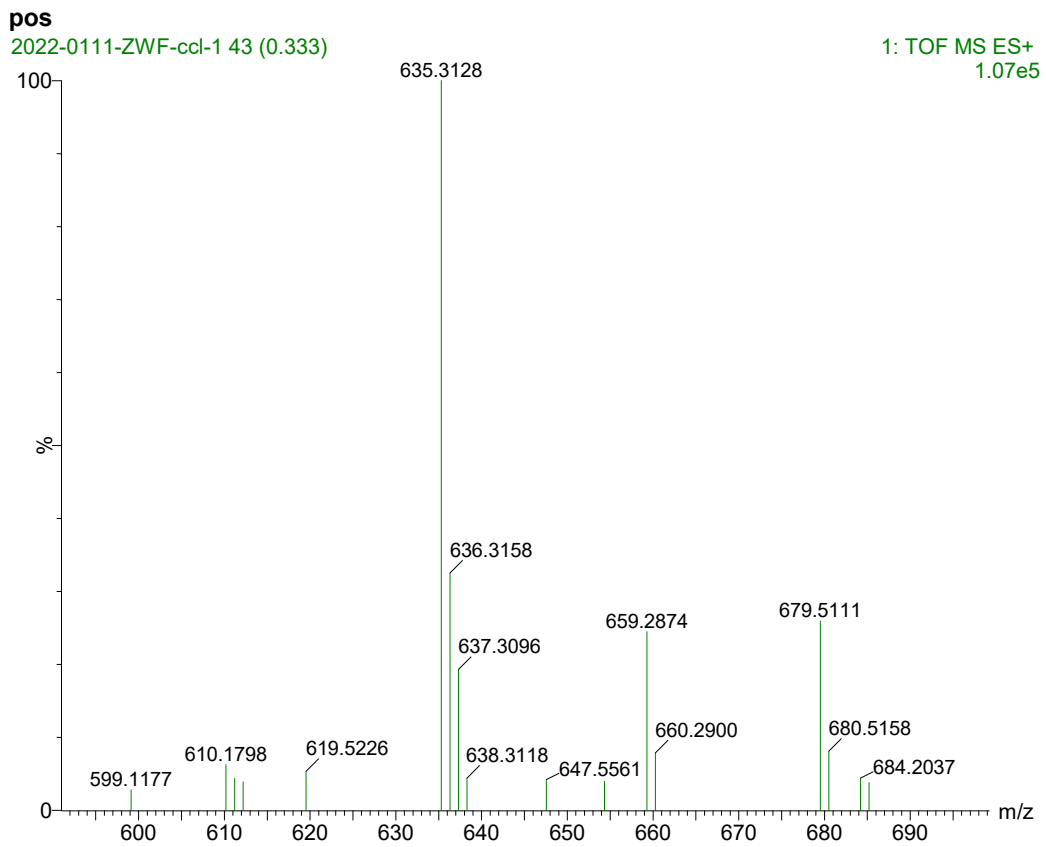

Figure.47. TOF MS spectrum of compound S-1

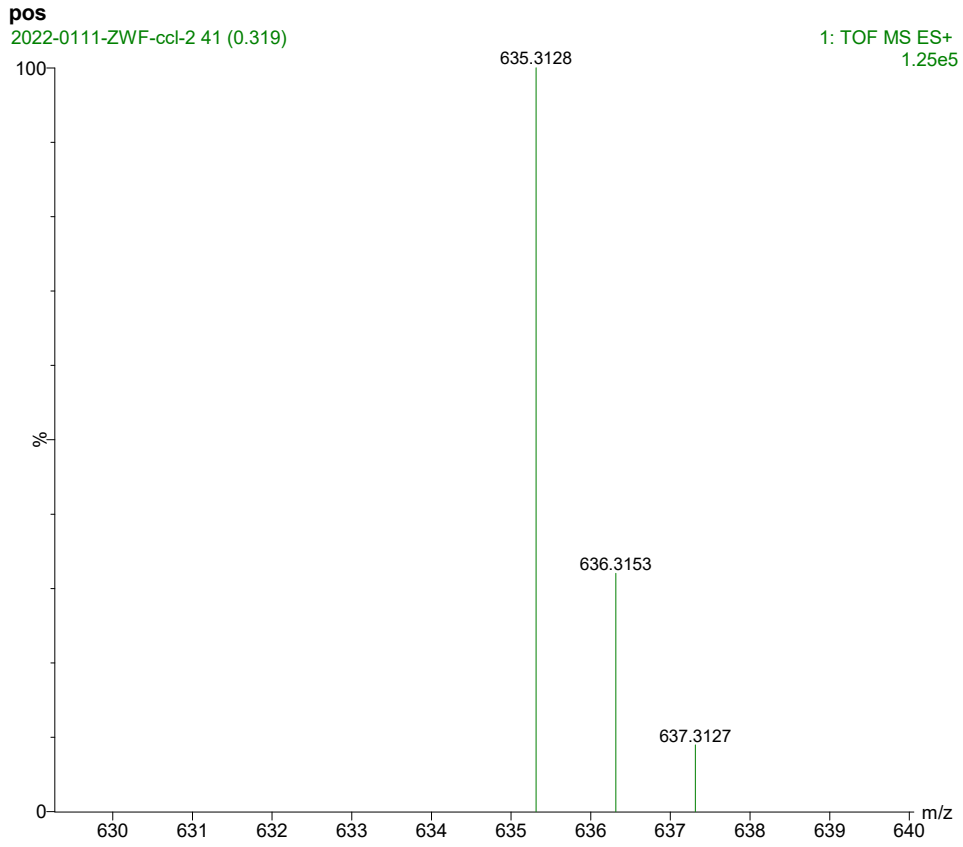

**Figure.48.** TOF MS spectrum of compound S-2

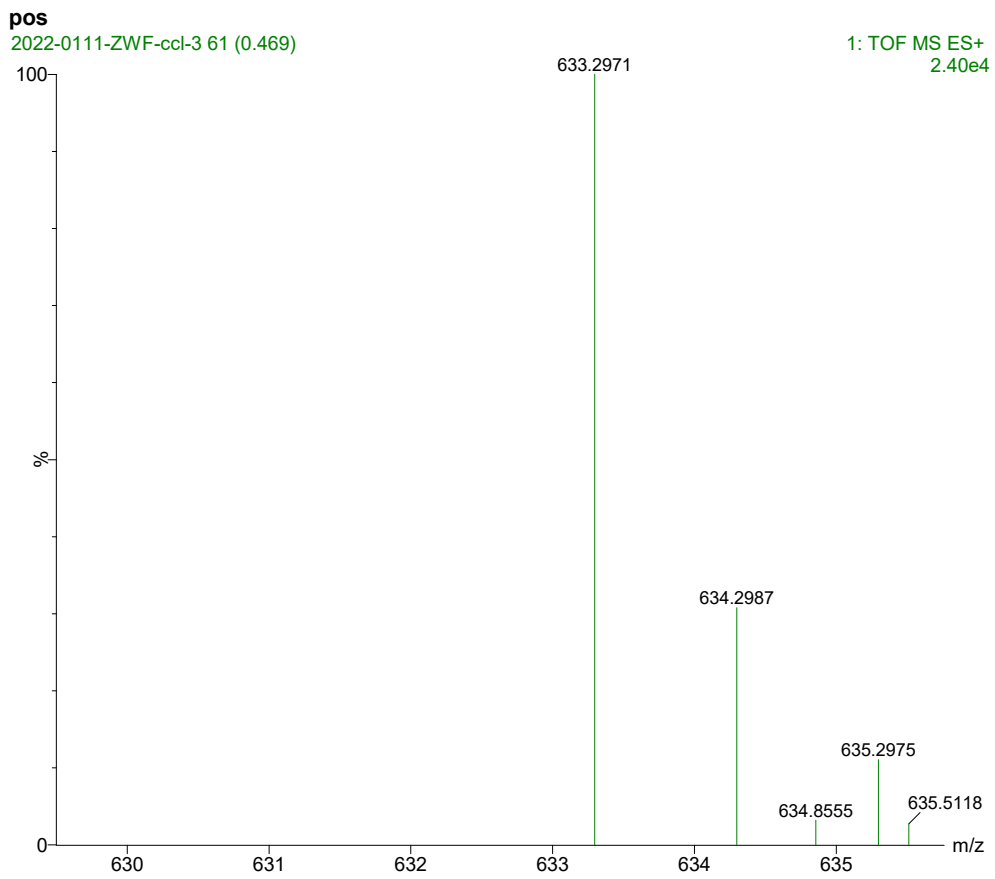

**Figure.49.** TOF MS spectrum of compound S-3

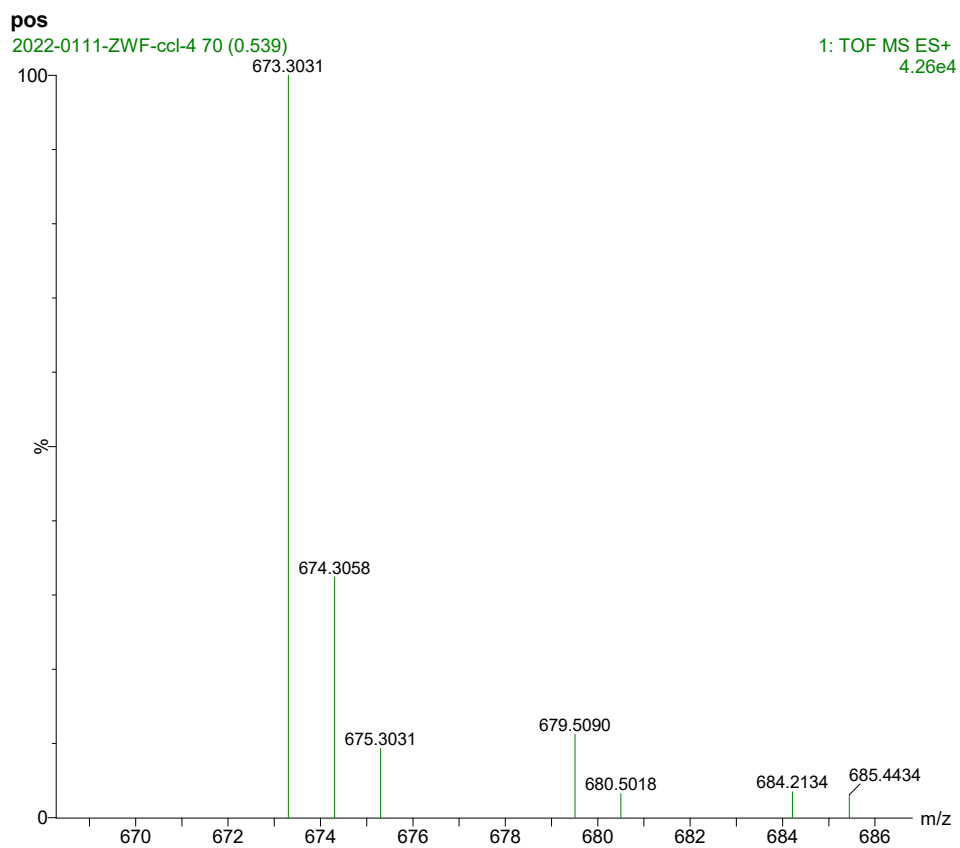

**Figure.50.** TOF MS spectrum of compound S-4

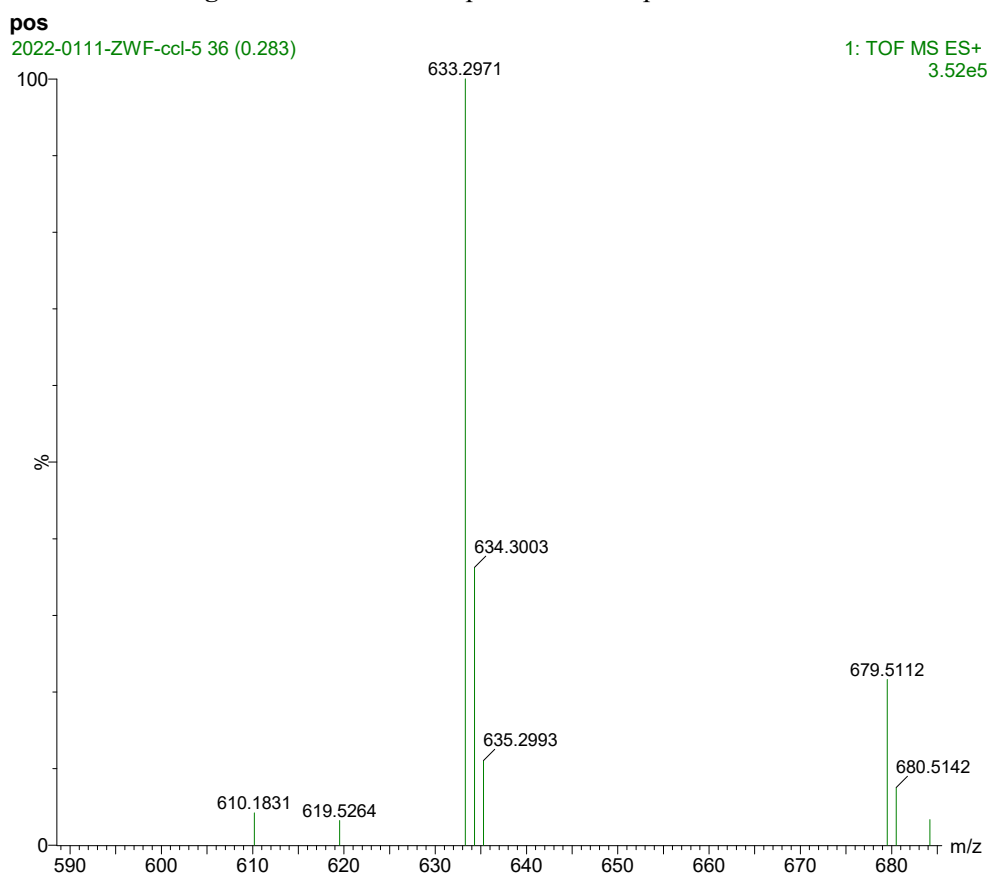

**Figure.51.** TOF MS spectrum of compound S-5

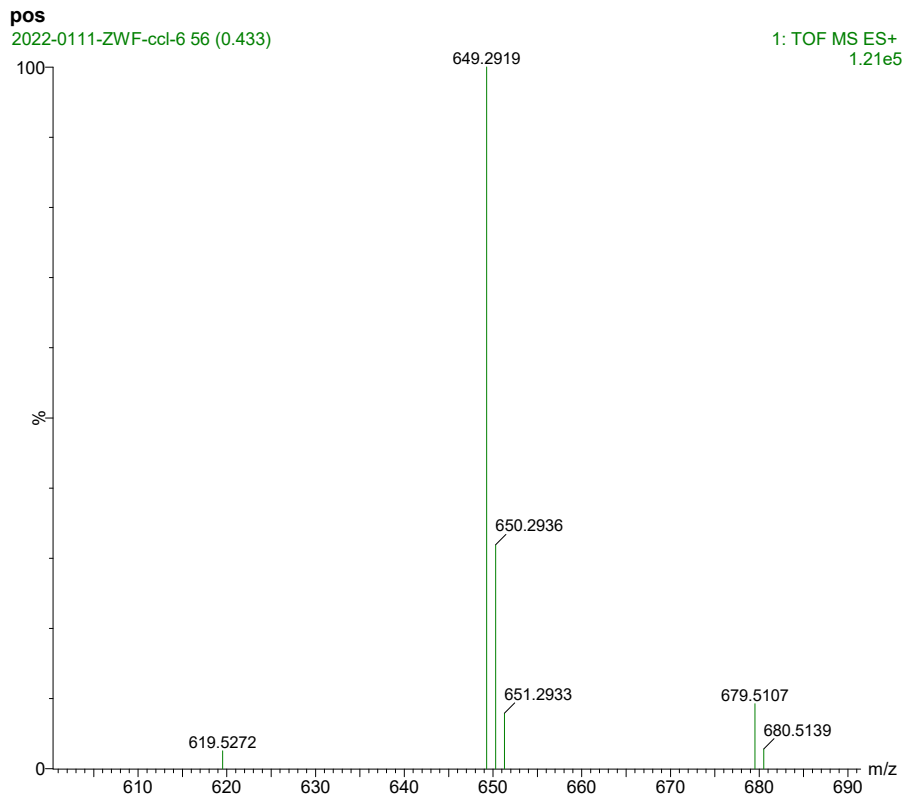

Figure.52. TOF MS spectrum of compound S-6

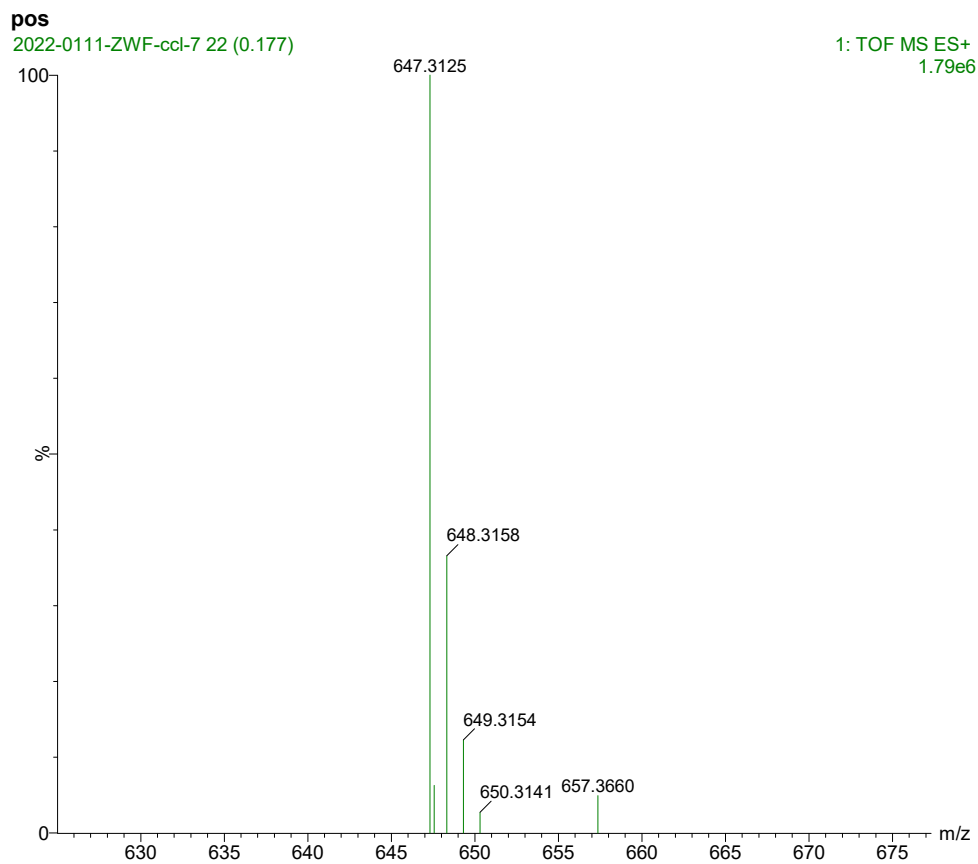

Figure.53. TOF MS spectrum of compound S-7

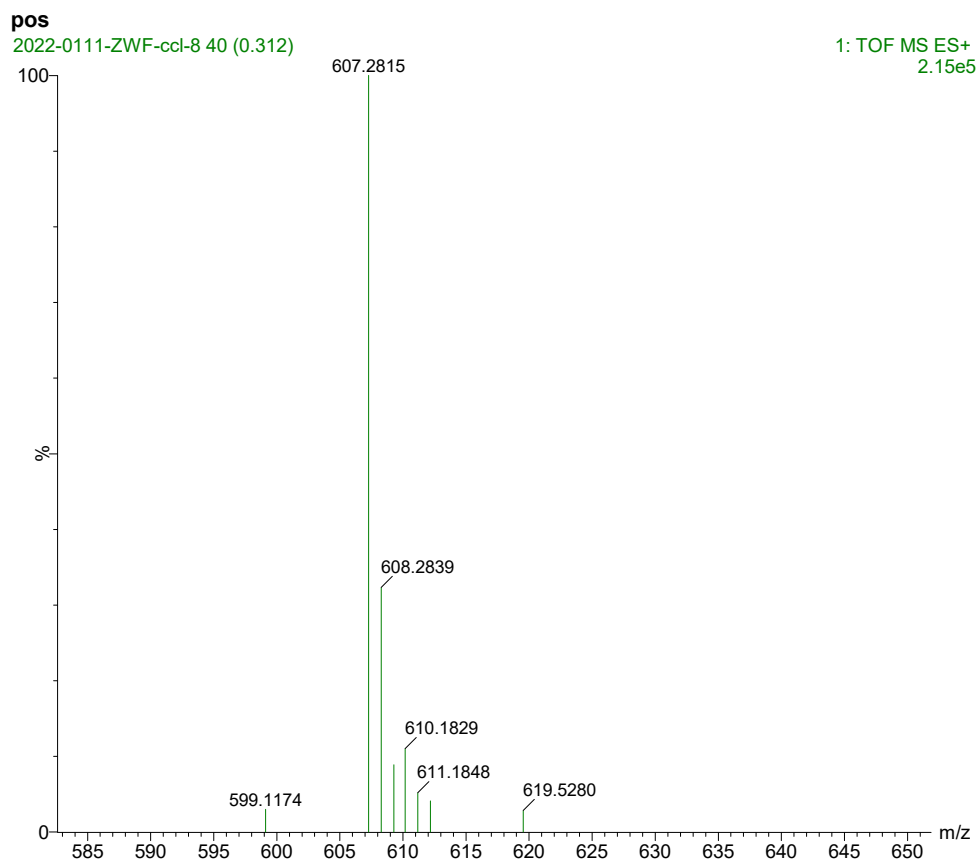

**Figure.54.** TOF MS spectrum of compound S-8

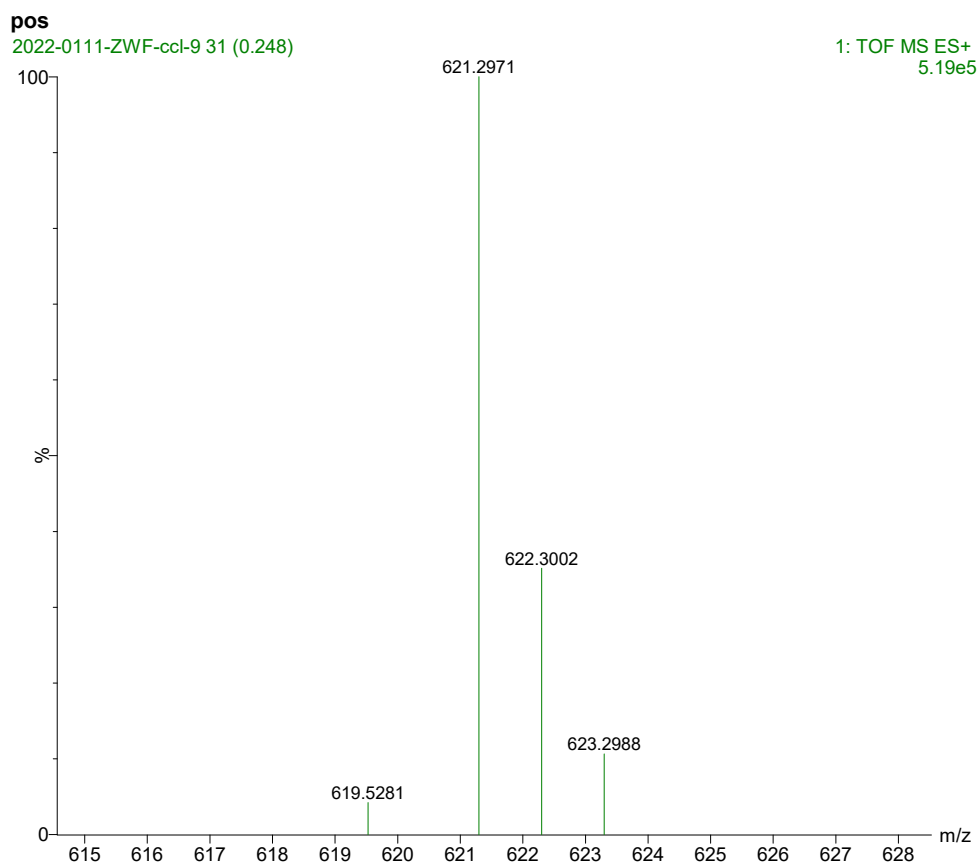

**Figure.55.** TOF MS spectrum of compound S-9

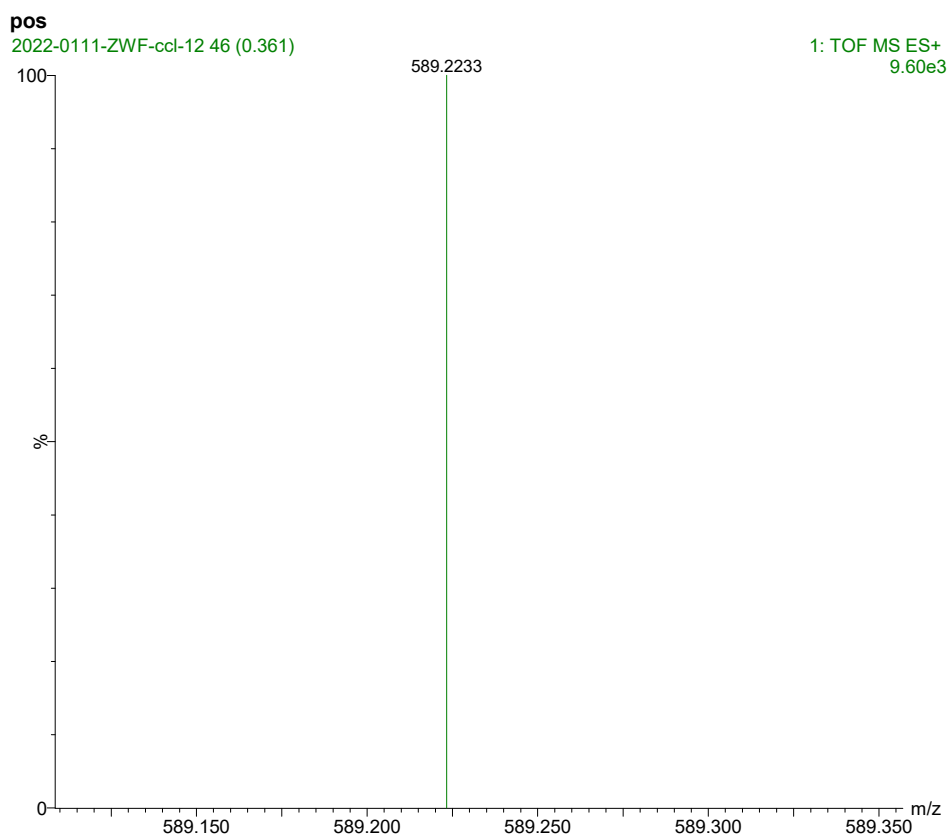

Figure.56. TOF MS spectrum of compound S-10

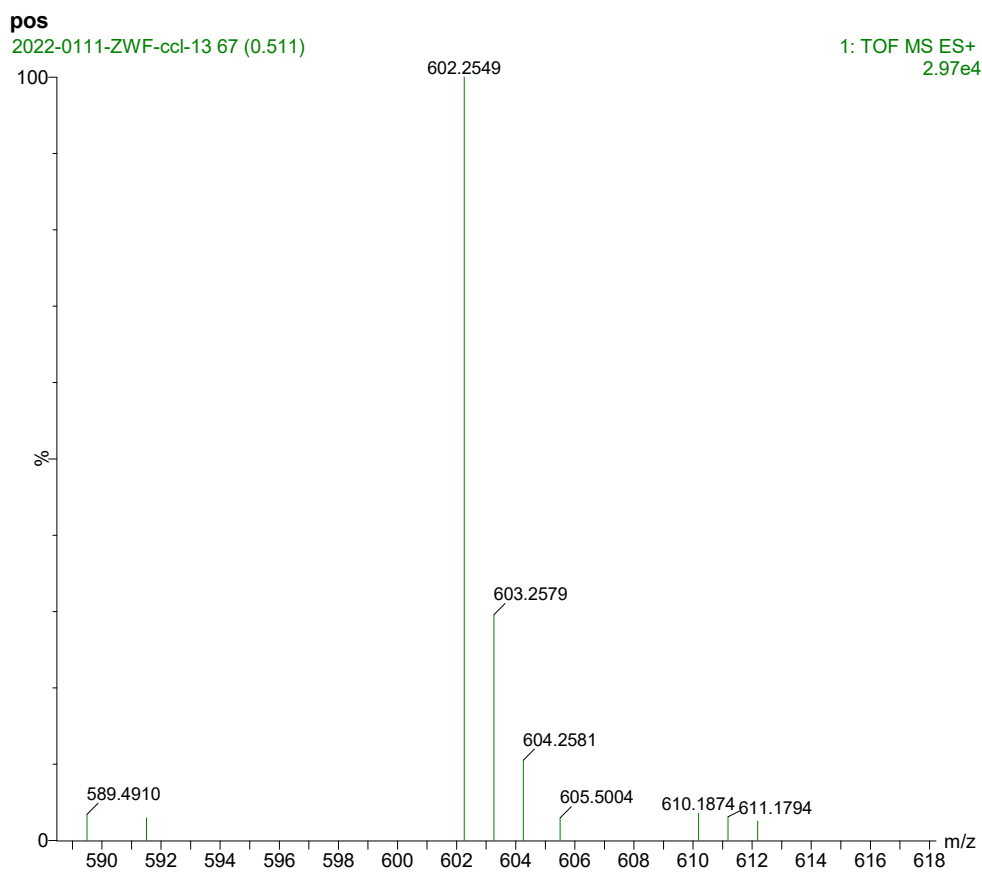

Figure.57. TOF MS spectrum of compound S-11



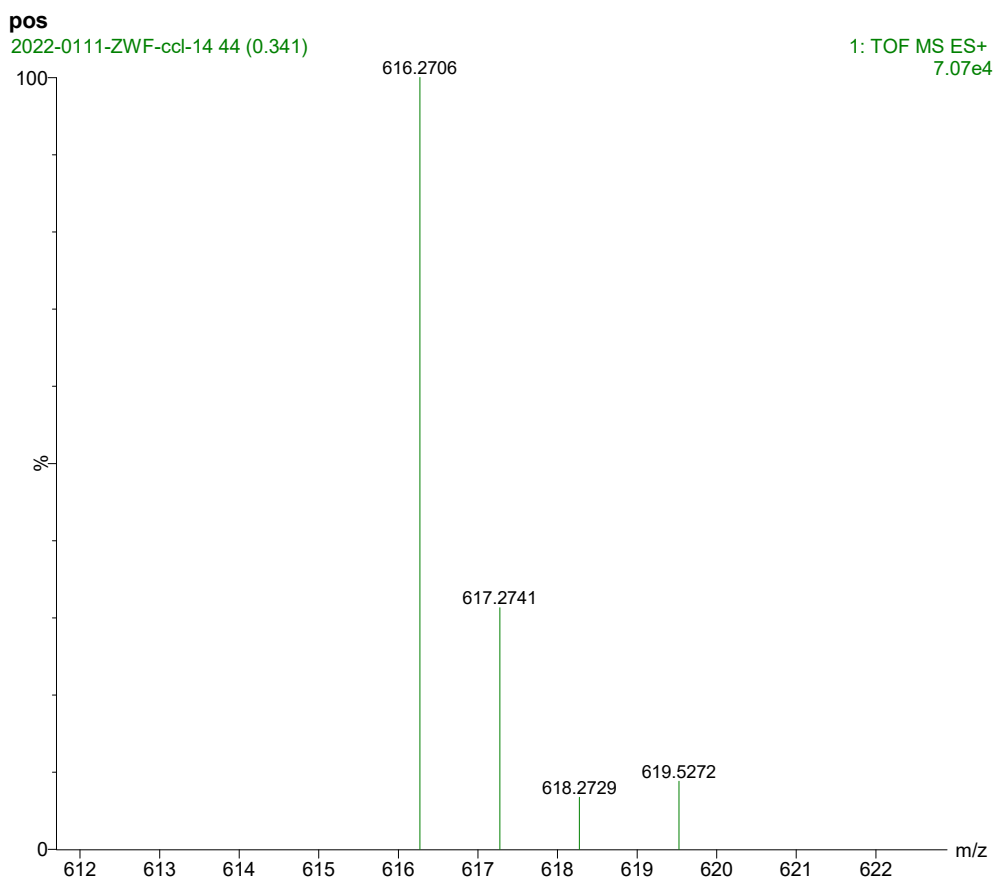

**Figure.58.** TOF MS spectrum of compound S-12

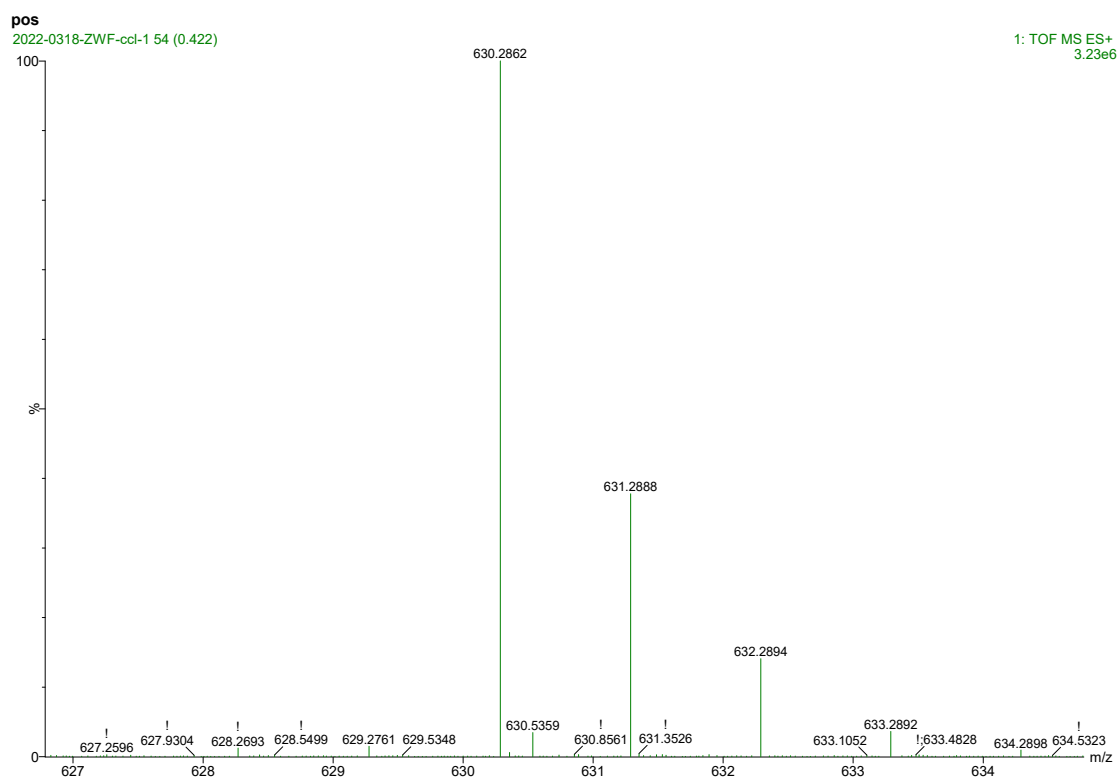

**Figure.59.** TOF MS spectrum of compound S-13

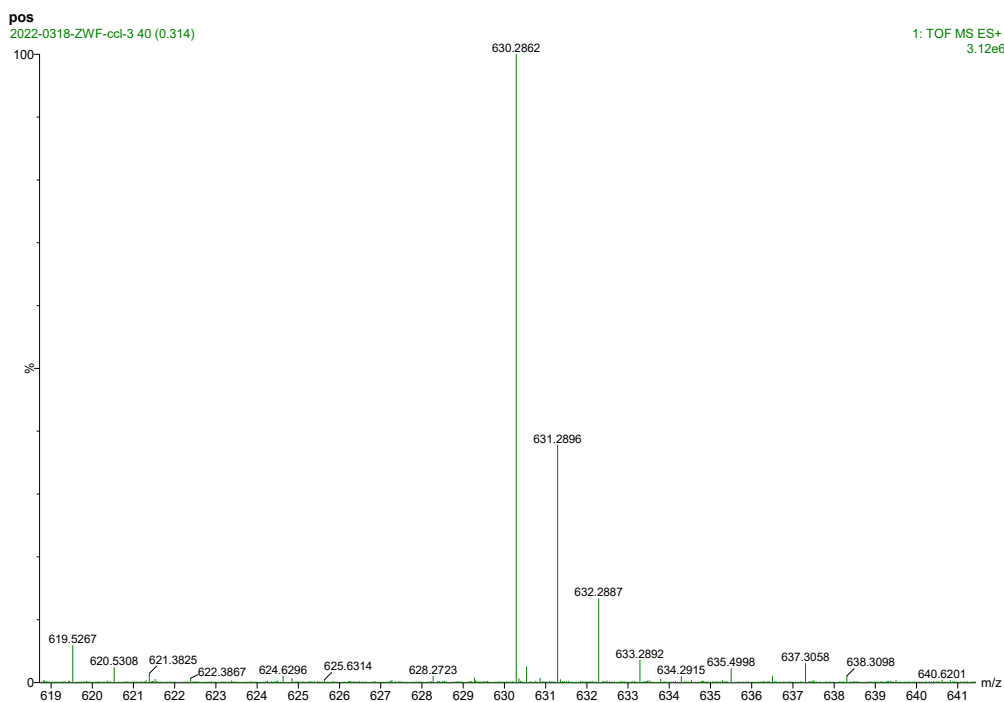

Figure.60. TOF MS spectrum of compound S-14

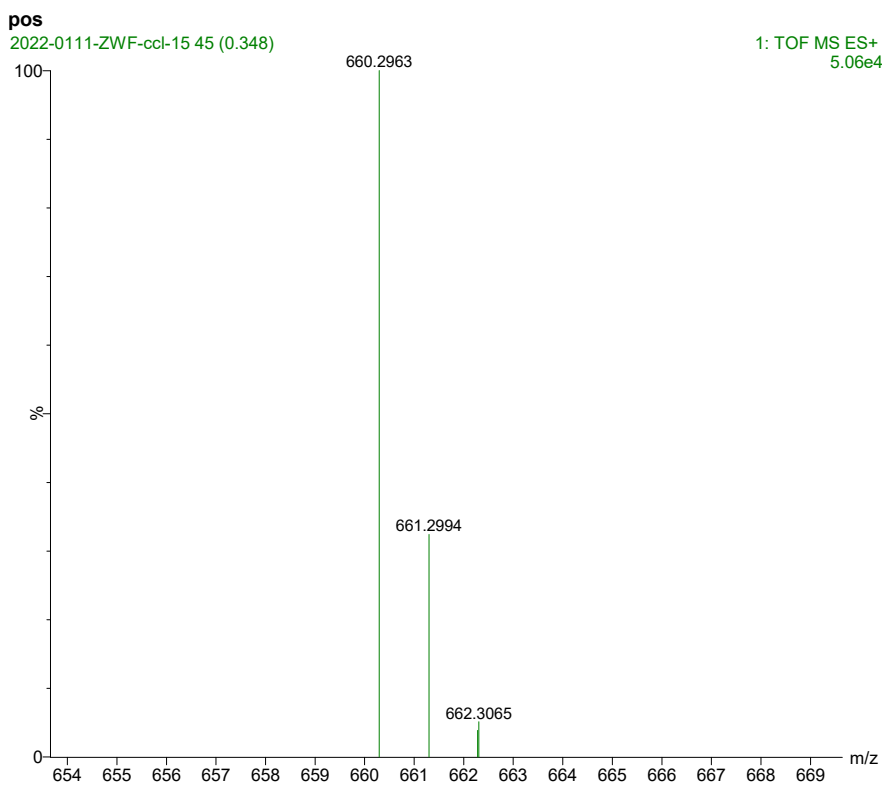

Figure.61. TOF MS spectrum of compound S-15

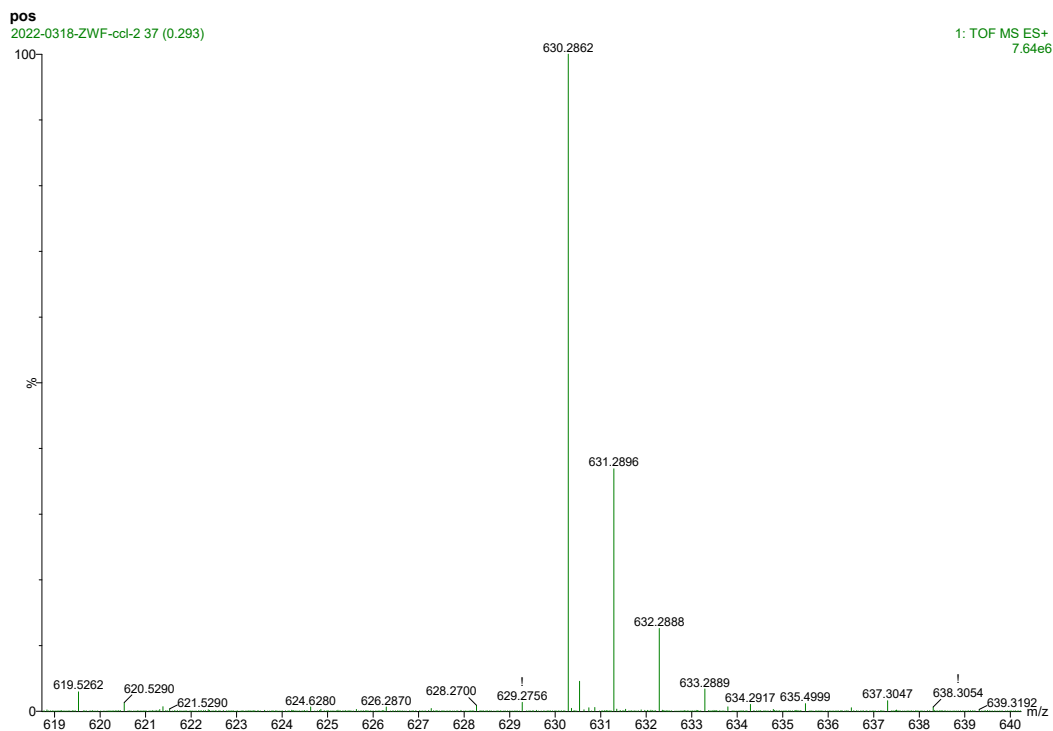

**Figure.62.** TOF MS spectrum of compound S-16

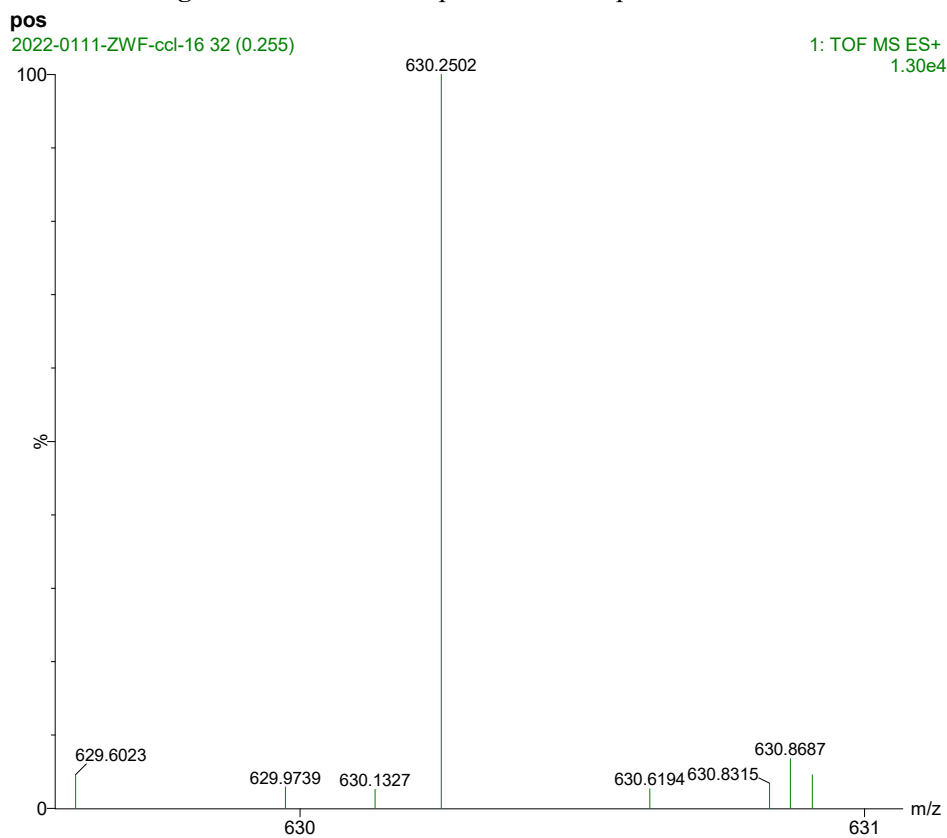

**Figure.63.** TOF MS spectrum of compound S-17
